# Supplementary material for: Scope and limitations of the dual-gold-catalysed hydrophenoxylation of alkynes
Source: PubMed Central journal article supplement (PMC4778530; doi:10.3762/bjoc.12.19), 2016-02-01
Supplement: Beilstein_J_Org_Chem-12-172-s001.pdf [file Beilstein_J_Org_Chem-12-172-s001.pdf]

**Supporting Information**  
**for**  
**Scope and limitations of the dual-gold-catalysed**  
**hydrophenoxylation of alkynes**

Adrián Gómez-Suárez<sup>1</sup>, Yoshihiro Oonishi<sup>1,2</sup>, Anthony R. Martin<sup>1,3</sup> and Steven P. Nolan<sup>\*4,5</sup>

Address: <sup>1</sup>EaStCHEM School of Chemistry, University of St. Andrews, North Haugh, St. Andrews, Fife, KY16 9ST, U.K, <sup>2</sup>Faculty of Pharmaceutical Sciences, Hokkaido University, Sapporo 060-0812, Japan, <sup>3</sup>Institut de Chimie de Nice, UMR 7272, Université de Nice Sophia Antipolis, CNRS, Parc Valrose, 06108 Nice cedex 2, France, <sup>4</sup>Chemistry Department, College of Science, King Saud University, P.O. Box 2455, Riyadh 11451, Saudi Arabia and <sup>5</sup>Universiteit Gent, Department of Inorganic and Physical Chemistry, Krijgslaan 281, S-3, B-9000 Ghent, Belgium.

Email: Steven P. Nolan - [stevenpnolan@gmail.com](mailto:stevenpnolan@gmail.com)

\*Corresponding author

**Experimental procedures and characterisation data**  
**for all the compounds**

## Table of Contents

|                                                                      |     |
|----------------------------------------------------------------------|-----|
| 1. General considerations .....                                      | S3  |
| 2. Synthesis & characterization of vinyl ether derivatives (6) ..... | S3  |
| 3. References .....                                                  | S11 |
| 4. NMR Spectra .....                                                 | S12 |

## 1. General considerations

Unless otherwise stated, all solvents and reagents were used as purchased and all reactions were performed under air. Deuterated solvents ( $\text{CD}_2\text{Cl}_2$ ,  $\text{CDCl}_3$ ) were filtered through basic alumina in order to remove traces of HCl. NMR spectra were recorded on 500, 400 and 300 MHz spectrometers at room temperature in  $\text{CD}_2\text{Cl}_2$  or  $\text{CDCl}_3$ . Chemical shifts ( $\delta$ ) are reported in ppm, relative to the solvent residual peak  $\text{CD}_2\text{Cl}_2$  (5.32 ppm for  $^1\text{H}$  and 54.00 ppm for  $^{13}\text{C}$ ) and  $\text{CDCl}_3$  (7.26 ppm for  $^1\text{H}$  and 77.16 ppm for  $^{13}\text{C}$ ). Data for  $^1\text{H}$  NMR are reported as follows: chemical shift, multiplicity (s = singlet, d = doublet, t = triplet, br = broad signal, m = multiplet), coupling constants ( $J$ ) in Hz and integration. Flash chromatography was performed on silica gel 60 Å pore diameter and 40–63  $\mu\text{m}$  particle size. Elemental analysis was carried out by the analytical services of London Metropolitan University. High-resolution mass spectrometry was performed by the EPSRC National Mass Spectrometry Service Centre (NMSSC) (Grove Building Extn., Swansea University, Singleton Park, Swansea, SA2 8PP, U.K.).  $[\{\text{Au}(\text{IPr})_2(\mu\text{-OH})\}[\text{BF}_4]]$  was synthesized following the reported methodologies [1]:

## 2. Synthesis & characterization of vinyl ether derivatives (6)

### General procedure

As described in reference [2],  $\{\text{Au}(\text{NHC})\}_2(\mu\text{-OH})[\text{BF}_4]$  (0.5–1.0 mol %) was added to a solution of alkyne (0.5 mmol) and phenol (0.55 mmol, 1.1 equiv) in toluene (1 mL). The reaction mixture was stirred at 80 or 110 °C. After the reaction was completed, the solvent was concentrated in vacuum. The residue was purified by flash column chromatography on silica gel to give the corresponding product.

### (Z)-4-((1,2-Diphenylvinyl)oxy)benzonitrile (3aa)

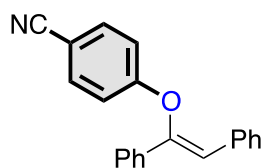

According to the general procedure for hydrophenoxylation, a crude product, which was prepared from diphenylacetylene (**1a**) (89.0 mg, 0.50 mmol), 4-hydroxybenzonitrile (**2a**) (65.5 mg, 0.55 mmol) and  $[\{\text{Au}(\text{IPr})\}_2(\mu\text{-OH})][\text{BF}_4]$  (6.5 mg, 5  $\mu\text{mol}$ , 1.0 mol %) in toluene (1 mL) at 110 °C for 24 h, was purified by column chromatography on silica gel (*n*-hexane/EtOAc = 95/5) to give **6aa** (74 mg, 50%, average of two

runs) as a white solid.

$^1\text{H}$  NMR ( $\text{CDCl}_3$ , 500 MHz):  $\delta$  7.58–7.55 (m, 4H), 7.54–7.51 (m, 2H), 7.38–7.28 (m, 5H), 7.25–7.22 (m, 1H), 7.11–7.07 (m, 2H), 6.75 (s, 1H).  $^{13}\text{C}\{^1\text{H}\}$  NMR ( $\text{CDCl}_3$ , 101 MHz):  $\delta$  159.94, 148.60, 135.02, 134.36, 134.05, 129.11, 129.03, 128.99, 128.78, 128.03, 125.79, 118.95, 117.43, 117.04, 105.72; HRMS (NIS) calcd for  $\text{C}_{21}\text{H}_{16}\text{NO}$  [(M+H) $^+$ ] 298.1226, found 298.1233.

### (Z)-1-(4-((1,2-Diphenylvinyl)oxy)phenyl)ethanone (3ab)

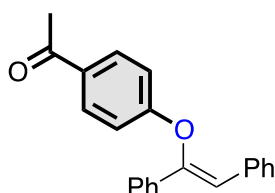

According to the general procedure for hydrophenoxylation, a crude product, which was prepared from diphenylacetylene (**1a**) (89.0 mg, 0.50 mmol), 4-hydroxyacetophenone (**2b**) (74.8 mg, 0.55 mmol) and  $[\{\text{Au}(\text{IPr})\}_2(\mu\text{-OH})][\text{BF}_4]$  (3.2 mg, 2.5  $\mu\text{mol}$ , 0.5 mol %) in toluene (1 mL) at 80 °C for 14 h, was purified by column chromatography on silica gel (*n*-hexane/EtOAc = 95/5) to give **3ab** (140 mg, 90%, average of two runs) as a white solid.

$^1\text{H}$  NMR ( $\text{CDCl}_3$ , 500 MHz):  $\delta$  7.88–7.86 (m, 2H), 7.61–7.58 (m, 4H), 7.36–7.28 (m, 5H), 7.24–7.21 (m, 1H), 7.09–7.06 (m, 2H), 6.74 (s, 1H), 2.51 (s, 3H).;  $^{13}\text{C}\{^1\text{H}\}$  NMR ( $\text{CDCl}_3$ , 101 MHz):  $\delta$  196.75, 160.51, 149.03, 135.46, 134.34, 131.69, 130.85, 129.11, 128.89, 128.84, 128.73, 127.83, 125.89, 117.18, 116.12, 26.49; HRMS (NIS) calcd for  $\text{C}_{22}\text{H}_{19}\text{O}_2$  [(M+H) $^+$ ] 315.1380, found 315.1385.

### (Z)-Methyl 4-[(1,2-diphenylvinyl)oxy]benzoate (**3ac**)

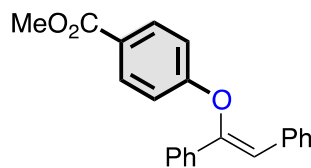

According to the general procedure for hydrophenoxylation, a crude product, which was prepared from diphenylacetylene (**1a**) (89.0 mg, 0.50 mmol), methyl 4-hydroxybenzoate (**2c**) (83.7 mg, 0.55 mmol) and  $[\{\text{Au}(\text{IPr})_2(\mu\text{-OH})\}][\text{BF}_4]$  (3.2 mg, 2.5  $\mu\text{mol}$ , 0.5 mol %) in toluene (1 mL) at 80 °C for 3 h, was purified by column chromatography on silica gel (*n*-hexane/EtOAc = 9/1) to give **3ac** (140 mg, 85%, average of two runs) as a white solid.

$^1\text{H NMR}$  ( $\text{CDCl}_3$ , 400 MHz)  $\delta$  7.97-7.88 (m, 2H), 7.64-7.53 (m, 4H), 7.39-7.17 (m, 6H), 7.09-6.99 (m, 2H), 6.72 (s, 1H), 3.85 (s, 3H);  $^{13}\text{C}\{^1\text{H}\}$  NMR ( $\text{CDCl}_3$ , 101 MHz)  $\delta$  166.7, 160.4, 149.1, 135.5, 134.4, 131.9, 129.1, 128.9, 128.8, 128.7, 127.8, 125.9, 124.2, 117.1, 116.1, 52.1; HRMS (NIS) calcd for  $\text{C}_{22}\text{H}_{19}\text{O}_3$   $[(\text{M}+\text{H})^+]$  331.1329, found 331.1327.

### (Z)-4-((1,2-Diphenylvinyl)oxy)benzaldehyde (**3ad**)

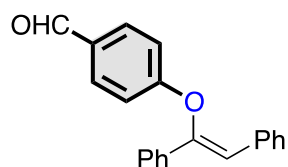

According to the general procedure for hydrophenoxylation, a crude product, which was prepared from diphenylacetylene (**1a**) (89.0 mg, 0.50 mmol), phenol (**2d**) (67.0 mg, 0.50 mmol) and  $[\{\text{Au}(\text{IPr})_2(\mu\text{-OH})\}][\text{BF}_4]$  (3.2 mg, 2.5  $\mu\text{mol}$ , 0.5 mol %) in toluene (1 mL) at 80 °C for 6 h, was purified by column chromatography on silica gel ( $\text{CH}_2\text{Cl}_2$ ), to give **3ad** (142 mg, 94%, average of two runs) as a colourless solid.

$^1\text{H NMR}$  ( $\text{CD}_2\text{Cl}_2$ , 300 MHz)  $\delta$  9.83 (s, 1H), 7.78-7.76 (m, 2H), 7.62-7.59 (m, 4H), 7.36-7.15 (m, 8H), 6.80 (s, 1H);  $^{13}\text{C}\{^1\text{H}\}$  NMR ( $\text{CDCl}_3$ , 75 MHz)  $\delta$  151.6, 150.4, 136.5, 135.3, 129.4, 129.1, 129.0, 127.9, 126.6, 117.6, 117.2; HRMS (APCI) calcd for  $\text{C}_{21}\text{H}_{17}\text{O}_2$   $[(\text{M}+\text{H})^+]$  301.1223, found 301.1222.

### (Z)-5-((1,2-Diphenylvinyl)oxy)benzo[d][1,3]dioxole (**3ae**)

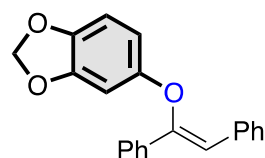

According to the general procedure for hydrophenoxylation, a crude product, which was prepared from diphenylacetylene (**1a**) (89.0 mg, 0.50 mmol), sesamol (**2e**) (70.0 mg, 0.50 mmol) and  $[\text{Au}(\text{IPr})_2(\mu\text{-OH})][\text{BF}_4]$  (3.2 mg, 2.5  $\mu\text{mol}$ , 0.5 mol %) in toluene (1 mL) at 80 °C for 1 h, was purified by column chromatography on silica gel (*n*-hexane/EtOAc = 95/5) to give **3ae** (150 mg, 94%, average of two runs) as a white solid.

$^1\text{H NMR}$  (400 MHz;  $\text{CDCl}_3$ ):  $\delta$  7.69-7.67 (m, 2H), 7.62-7.60 (m, 2H), 7.37-7.23 (m, 6H), 6.65 (d,  $J = 8.5$  Hz, 1H + d,  $J = 2.5$  Hz, 1H + s, 1H), 6.49 (dd,  $J = 8.5, 2.5$  Hz, 1H), 5.88 (s, 2H).  $^{13}\text{C}\{^1\text{H}\}$  NMR (101 MHz,  $\text{CDCl}_3$ ):  $\delta$  151.46, 150.08, 148.47, 142.66, 136.07, 134.85, 129.03, 128.66, 128.52, 127.52, 126.23, 116.82, 108.30, 108.23, 101.40, 99.18. HRMS (APCI) calcd. for  $\text{C}_{21}\text{H}_{17}\text{O}_3$   $[(\text{M}+\text{H})^+]$  317.1172, found 317.1170.

### (Z)-2-((1,2-Diphenylvinyl)oxy)naphthalene (**3af**)

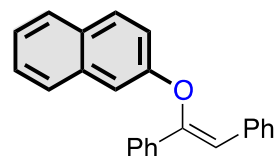

According to the general procedure for hydrophenoxylation, a crude product, which was prepared from diphenylacetylene (**1a**) (89.0 mg, 0.50 mmol), naphthol (**2f**) (79.3 mg, 0.55 mmol) and  $[\{\text{Au}(\text{IPr})_2(\mu\text{-OH})\}][\text{BF}_4]$  (3.2 mg, 2.5  $\mu\text{mol}$ , 0.5 mol %) in toluene (1 mL) at 80 °C for 3 h, was purified by column chromatography on silica gel (*n*-hexane/EtOAc = 95/5) to give **3af** (158 mg, 98%, average of two runs) as a white solid.

$^1\text{H NMR}$  ( $\text{CDCl}_3$ , 300 MHz)  $\delta$  7.82-7.72 (m, 2H), 7.71-7.57 (m, 5H), 7.43-7.14 (m, 10H), 6.75 (s, 1H);  $^{13}\text{C}\{^1\text{H}\}$  NMR ( $\text{CDCl}_3$ , 75 MHz)  $\delta$  154.3, 149.7, 135.9, 134.8, 134.5, 130.0, 129.7, 129.1, 128.7, 128.7, 128.6, 127.8, 127.6, 127.1, 126.5, 126.1, 124.3, 118.3, 117.1, 111.1; HRMS (APCI) calcd for  $\text{C}_{24}\text{H}_{19}\text{O}$   $[(\text{M}+\text{H})^+]$  323.1430, found 323.1430.

### (Z)-[1-(3,5-Dimethylphenoxy)ethene-1,2-diyl]dibenzene (3ai)

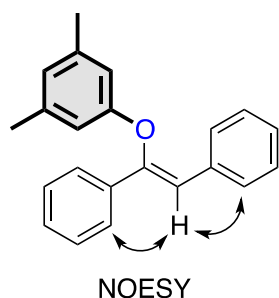

According to the general procedure for hydrophenoxylation, a crude product, which was prepared from diphenylacetylene (**1a**) (89.0 mg, 0.50 mmol), 3,5-dimethylphenol (**2i**) (67.0 mg, 0.55 mmol) and  $[\text{Au}(\text{IPr})_2(\mu\text{-OH})][\text{BF}_4]$  (3.2 mg, 2.5  $\mu\text{mol}$ , 0.5 mol %) in toluene (1 mL) at 80 °C for 2 h, was purified by column chromatography on silica gel (*n*-hexane/EtOAc = 95/5) to give **3ai** (142 mg, 94%, average of two runs) as a white solid.

$^1\text{H NMR}$  ( $\text{CDCl}_3$ , 400 MHz)  $\delta$  7.68-7.62 (m, 2H), 7.62-7.57 (m, 2H), 7.37-7.15 (m, 6H), 6.65 (brs, 2H), 6.64 (s, 1H), 6.59 (brs, 1H), 2.21 (s, 6H);  $^{13}\text{C}\{^1\text{H}\}$  NMR ( $\text{CDCl}_3$ , 101 MHz)  $\delta$  156.4, 149.8, 139.5, 139.5,

136.3, 135.0, 129.1, 128.6, 128.4, 127.4, 126.1, 124.0, 116.7, 114.1, 21.5; HRMS (APCI) calcd for  $\text{C}_{22}\text{H}_{20}\text{O}$  [ $\text{M}^+$ ] 300.1509, found 300.1507.

### (Z)-[1-(4-Chloro-3,5-dimethylphenoxy)ethene-1,2-diyl]dibenzene (3aj)

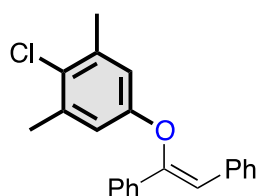

According to the general procedure for hydrophenoxylation, a crude product, which was prepared from alkyne **1a** (89.0 mg, 0.50 mmol), phenol (**2j**) (86.0 mg, 0.50 mmol) and  $[\text{Au}(\text{IPr})_2(\mu\text{-OH})][\text{BF}_4]$  (3.2 mg, 2.5  $\mu\text{mol}$ , 0.5 mol %) in toluene (1 mL) at 80 °C for 6 h, was purified by column chromatography on silica gel (pentane/EtOAc = 95/5), to give **3aj** (164 mg, 98%, average of two runs) as a colourless solid.

$^1\text{H NMR}$  ( $\text{CDCl}_3$ , 300 MHz)  $\delta$  7.64 (ddd,  $J = 14.4, 7.7, 1.5$  Hz, 4H), 7.38-7.22 (m, 6H), 6.80 (s, 2H), 6.69 (s, 1H), 2.30 (s, 6H);  $^{13}\text{C}\{^1\text{H}\}$  NMR ( $\text{CDCl}_3$ , 75 MHz)  $\delta$  154.2, 149.5, 137.6, 135.9, 134.8, 129.1, 128.7, 128.7, 128.6, 127.6, 126.1, 117.0, 116.2, 21.1; HRMS (APCI) calcd for  $\text{C}_{22}\text{H}_{20}\text{OCl}$  [ $\text{M}+\text{H}^+$ ] 335.1197, found 335.1195.

### (Z)-[1-(2-Chloro-4-fluorophenoxy)ethene-1,2-diyl]dibenzene (3ak)

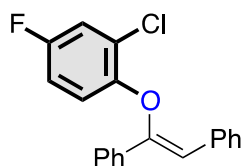

According to the general procedure for hydrophenoxylation, a crude product, which was prepared from diphenylacetylene (**1a**) (89.0 mg, 0.50 mmol), 2-chloro-4-fluorophenol (**2k**) (81.0 mg, 0.55 mmol) and  $[\text{Au}(\text{IPr})_2(\mu\text{-OH})][\text{BF}_4]$  (6.5 mg, 5  $\mu\text{mol}$ , 1.0 mol %) in toluene (1 mL) at 110 °C for 6 h, was purified by column chromatography on silica gel (*n*-hexane/EtOAc = 95/5) to give **3ak** (143 mg, 88%, average of two runs)

as a white solid whose NMR data were consistent to those reported in the literature [3].

$^1\text{H NMR}$  ( $\text{CDCl}_3$ , 300 MHz)  $\delta$  7.70-7.61 (m, 2H), 7.61-7.54 (m, 2H), 7.39-7.13 (m, 7H), 6.77 (dd,  $J = 9.1, 5.0$  Hz, 1H), 6.73-6.64 (m, 2H);  $^{13}\text{C}\{^1\text{H}\}$  NMR ( $\text{CDCl}_3$ , 75 MHz)  $\delta$  157.3 (d,  $J_{\text{C-F}} = 243$  Hz), 149.7, 148.1 (d,  $J_{\text{C-F}} = 2.8$  Hz), 135.2, 134.4, 129.0, 128.88, 128.87, 128.7, 127.8, 126.0, 123.4 (d,  $J_{\text{C-F}} = 11$  Hz), 117.8 (d,  $J_{\text{C-F}} = 26$  Hz), 117.2, 116.6 (d,  $J_{\text{C-F}} = 8.6$  Hz), 114.5 (d,  $J_{\text{C-F}} = 23$  Hz);  $^{19}\text{F NMR}$  ( $\text{CDCl}_3$ , 282 MHz)  $\delta$  -120.3.

### (Z)-[1-(2-Chlorophenoxy)ethene-1,2-diyl]dibenzene (3al)

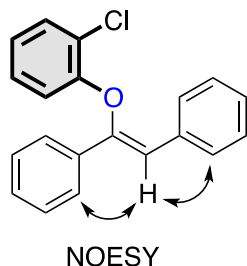

According to the general procedure for hydrophenoxylation, a crude product, which was prepared from diphenylacetylene (**1a**) (89.0 mg, 0.50 mmol), 2-chlorophenol (**2l**) (70.7 mg, 0.55 mmol) and  $[\text{Au}(\text{IPr})_2(\mu\text{-OH})][\text{BF}_4]$  (6.5 mg, 5  $\mu\text{mol}$ , 1.0 mol %) in toluene (1 mL) at 110 °C for 3 h, was purified by column chromatography on silica gel (*n*-hexane/EtOAc = 95/5) to give **3al** (141 mg, 92%, average of two runs) as a colourless liquid whose NMR data were consistent to those reported in the literature [3].

$^1\text{H NMR}$  ( $\text{CDCl}_3$ , 300 MHz)  $\delta$  7.72-7.65 (m, 2H), 7.65-7.57 (m, 2H), 7.43 (dd,  $J = 7.8, 1.7$  Hz, 1H), 7.39-7.18 (m, 6H), 6.99 (dt,  $J = 7.7, 1.7$  Hz, 1H), 6.93-6.79 (m, 2H), 6.72 (s, 1H);  $^{13}\text{C}\{^1\text{H}\}$  NMR ( $\text{CDCl}_3$ , 75 MHz)  $\delta$  151.7, 149.5, 135.4, 134.5, 130.6, 129.1, 128.8, 128.8, 128.7, 127.8, 127.7, 125.9, 123.0, 122.9, 117.1, 116.3.

### (Z)-[1-(2-Allylphenoxy)ethene-1,2-diyl]dibenzene (3am)

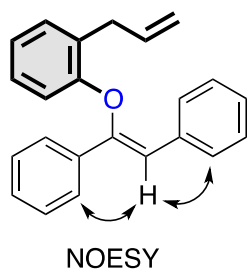

According to the general procedure for hydrophenoxylation, a crude product, which was prepared from diphenylacetylene (**1a**) (89.0 mg, 0.50 mmol), 2-allylphenol (**2m**) (74.0 mg, 0.55 mmol) and  $[\{\text{Au}(\text{IPr})\}_2(\mu\text{-OH})][\text{BF}_4]$  (6.5 mg, 5  $\mu\text{mol}$ , 1.0 mol %) in toluene (1 mL) at 110 °C for 3 h, was purified by column chromatography on silica gel (*n*-hexane/EtOAc = 95/5) to give **3am** (144 mg, 92%, average of two runs) as a white solid.

$^1\text{H NMR}$  ( $\text{CDCl}_3$ , 300 MHz):  $\delta$  7.66-7.59 (m, 2H), 7.58-7.51 (m, 2H), 7.39-7.15 (m, 7H), 7.02-6.84 (m, 2H), 6.73 (dd,  $J = 7.8, 1.6$  Hz, 1H), 6.67 (s, 1H), 6.25-6.06 (m, 1H), 5.25-5.09 (m, 2H), 3.69 (ddd,  $J = 6.5, 1.6, 1.6$  Hz, 2H);  $^{13}\text{C}\{^1\text{H}\}$  NMR ( $\text{CDCl}_3$ , 101 MHz)  $\delta$  153.8, 149.7, 137.0, 136.1, 134.9, 130.6, 129.0, 128.7, 128.6, 128.5, 128.4, 127.51, 127.45, 126.0, 122.0, 116.9, 116.1, 114.5, 34.3; HRMS (APCI) calcd for  $\text{C}_{23}\text{H}_{21}\text{O}$   $[(\text{M}+\text{H})^+]$  313.1587, found 313.1588.

### (Z)-[1-(2,4-Di-*tert*-butylphenoxy)ethene-1,2-diyl]dibenzene (3an)

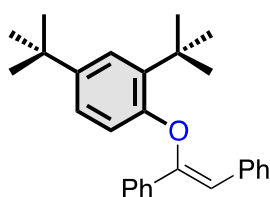

According to the general procedure for hydrophenoxylation, a crude product, which was prepared from diphenylacetylene (**1a**) (89.0 mg, 0.50 mmol), 2,4-di-*tert*-butylphenol (**2o**) (103.2 mg, 0.50 mmol) and  $[\{\text{Au}(\text{IPr})\}_2(\mu\text{-OH})][\text{BF}_4]$  (6.5 mg, 5  $\mu\text{mol}$ , 1.0 mol %) in toluene (1 mL) at 80 °C for 14 h, was purified by column chromatography on silica gel (*n*-hexane/EtOAc = 95/5) to give **3an** (160 mg, 83%, average of two runs) as an off-white solid.

$^1\text{H NMR}$  ( $\text{CDCl}_3$ , 300 MHz):  $\delta$  7.62 - 7.58 (m, 2H), 7.57 - 7.53 (m, 2H), 7.40 (d,  $J = 2.5$  Hz, 1H), 7.35 - 7.21 (m, 5H), 7.20 - 7.15 (m, 1H), 6.93 (dd,  $J = 8.5, 2.5$  Hz, 1H), 6.69 (d,  $J = 8.7$  Hz, 1H), 6.67 (s, 1H), 1.58 (s, 9H), 1.26 (s, 9H).  $^{13}\text{C}\{^1\text{H}\}$  NMR (101 MHz,  $\text{CDCl}_3$ ):  $\delta$  152.77, 149.60, 143.77, 136.60, 136.35, 134.95, 129.04, 128.61, 128.42, 128.30, 127.35, 126.43, 124.51, 123.79, 117.49, 114.69, 35.40, 34.44, 31.72, 30.63. HRMS (APCI) calcd for  $\text{C}_{28}\text{H}_{33}\text{O}$   $[(\text{M}+\text{H})^+]$  385.2526, found 385.2519.

### (Z)-2-((1,2-Diphenylvinyl)oxy)phenol (3ap)

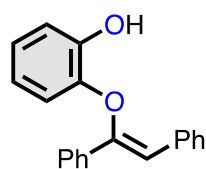

According to the general procedure for hydrophenoxylation, a crude product, which was prepared from diphenylacetylene (**1a**) (89.0 mg, 0.50 mmol), catechol (**2p**) (55.1 mg, 0.50 mmol) and  $[\text{Au}(\text{IPr})_2(\mu\text{-OH})][\text{BF}_4]$  (3.2 mg, 2.5  $\mu\text{mol}$ , 0.5 mol %) in toluene (1 mL) at 80 °C for 6 h, was purified by column chromatography on silica gel (*n*-hexane/EtOAc = 95/5) to give **3ap** (100 mg, 70%, average of two runs) as a colourless liquid,

whose NMR data were consistent to those reported in the literature [4].

$^1\text{H NMR}$  (300 MHz;  $\text{CDCl}_3$ ):  $\delta$  7.60-7.57 (m, 2H), 7.54-7.50 (m, 2H), 7.36-7.28 (m, 5H), 7.27-7.21 (m, 1H), 7.03 (dd,  $J = 8.0, 1.5$  Hz, 1H), 6.88 (td,  $J = 7.7, 1.5$  Hz, 1H), 6.75 (dd,  $J = 8.1, 1.5$  Hz, 1H), 6.71 (s, 1H), 6.64 (ddd,  $J = 8.1, 7.4, 1.6$  Hz, 1H), 5.87 (s, 1H).  $^{13}\text{C}\{^1\text{H}\}$  NMR (101 MHz,  $\text{CDCl}_3$ ):  $\delta$  149.27, 145.79, 143.16, 135.25, 134.45, 128.91, 128.84, 128.77, 127.81, 125.79, 123.22, 120.62, 117.44, 115.78, 115.08.

### 1,2-Bis(((Z)-1,2-diphenylvinyl)oxy)benzene (4ap)

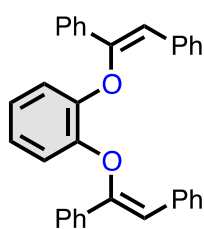

According to the general procedure for hydrophenoxylation, a crude product, which was prepared from diphenylacetylene (**1a**) (178.0 mg, 1 mmol), catechol (**2p**) (55.1 mg, 0.50 mmol) and  $[\text{Au}(\text{IPr})_2(\mu\text{-OH})][\text{BF}_4]$  (3.2 mg, 0.25  $\mu\text{mol}$ , 0.5 mol %) in toluene (1 mL) at 80 °C for 18 h, was purified by column chromatography on silica gel (*n*-hexane/EtOAc = 95/5) to give **4ap** (256 mg, 55%, average of two runs) as a colourless liquid, whose NMR data were consistent to those reported in the literature [4].

$^1\text{H NMR}$  (400 MHz;  $\text{CDCl}_3$ ):  $\delta$  7.82-7.77 (m, 8H), 7.42-7.33 (m, 10H), 7.32-7.27 (m, 2H), 6.90-6.86 (dt,  $J = 6.0, 3.6$  Hz, 2H), 6.76 (s, 2H), 6.69 (dt,  $J = 6.4, 3.3$  Hz, 2H).  $^{13}\text{C}\{^1\text{H}\}$  NMR ( $\text{CDCl}_3$ , 101 MHz):  $\delta$  150.00, 145.53, 136.01, 135.01, 129.19, 128.78, 128.71, 128.66, 127.59, 126.16, 122.60, 117.04, 116.33, 77.48, 77.16, 76.84.

### 1,3-Bis[(Z)-1,2-diphenylvinyl]oxy]benzene (4aq)

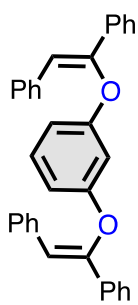

According to the general procedure for hydrophenoxylation, a crude product, which was prepared from diphenylacetylene (**1a**) (89.0 mg, 0.50 mmol), resorcinol (**2q**) (28.0 mg, 0.25 mmol) and  $[\{\text{Au}(\text{IPr})_2(\mu\text{-OH})\}][\text{BF}_4]$  (3.2 mg, 2.5  $\mu\text{mol}$ , 1.0 mol %) in toluene (1 mL) at 80 °C for 6 h, was purified by column chromatography on silica gel (*n*-hexane/EtOAc = 95/5) to give **4aq** (198 mg, 84%, average of two runs) as a white solid, whose NMR data were consistent to those reported in the literature [4].

$^1\text{H NMR}$  ( $\text{CDCl}_3$ , 300 MHz)  $\delta$  7.61-7.53 (m, 4H), 7.52-7.43 (m, 4H), 7.34-7.16 (m, 12H), 7.02 (t,  $J = 8.2$  Hz, 1H), 6.74 (t,  $J = 2.3$  Hz, 1H), 6.60 (brs, 3H), 6.58 (d,  $J = 2.3$  Hz, 1H);  $^{13}\text{C}\{^1\text{H}\}$  NMR ( $\text{CDCl}_3$ , 75 MHz)  $\delta$  157.7, 149.7, 135.9, 134.7, 130.4, 129.0, 128.6, 128.6, 128.4, 127.4, 126.1, 116.7, 110.2, 105.6.

### 1,4-Bis(((Z)-1,2-diphenylvinyl)oxy)benzene (4ar)

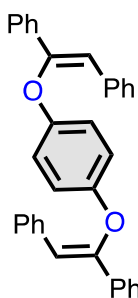

According to the general procedure for hydrophenoxylation, a crude product, which was prepared from alkyne **1a** (89.0 mg, 0.50 mmol), hydroquinone (**2r**) (28.0 mg, 0.25 mmol) and  $[\{\text{Au}(\text{IPr})_2(\mu\text{-OH})\}][\text{BF}_4]$  (3.2 mg, 2.5  $\mu\text{mol}$ , 0.5 mol %) in toluene (1 mL) at 80 °C for 1 h, was purified by trituration in pentane after evaporation of the volatiles, to give **4ar** (212 mg, 95%, average of two runs) as a colourless solid, whose NMR data were consistent to those reported in the literature [4].

$^1\text{H NMR}$  ( $\text{CD}_2\text{Cl}_2$ , 500 MHz)  $\delta$  7.62-7.60 (m, 2H), 7.56-7.54 (m, 2H), 7.33-7.26 (m, 5H), 7.22-7.18 (m, 1H), 6.88 (s, 2H), 6.61 (s, 1H);  $^{13}\text{C}\{^1\text{H}\}$  NMR ( $\text{CDCl}_3$ , 75 MHz)  $\delta$  151.6, 150.7, 136.5, 135.3, 129.4, 129.1, 129.0, 127.9, 126.6, 117.6, 117.2.

### 1,4-Bis(((Z)-1,2-diphenylvinyl)oxy)-2,5-dichlorobenzene (4as)

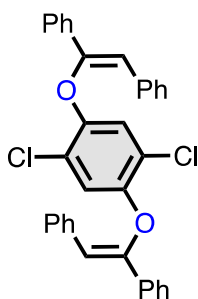

According to the general procedure for hydrophenoxylation, a crude product, which was prepared from alkyne (**1a**) (89.0 mg, 0.50 mmol), hydroquinone **2s** (45.0 mg, 0.25 mmol) and  $[\{\text{Au}(\text{IPr})_2(\mu\text{-OH})\}][\text{BF}_4]$  (3.2 mg, 2.5  $\mu\text{mol}$ , 0.5 mol %) in toluene (1 mL) at 80 °C for 16 h, was purified by trituration in pentane after evaporation of the volatiles, to give **4as** (64 mg, 47%, average of two runs) as an off-white solid.

$^1\text{H NMR}$  ( $\text{CD}_2\text{Cl}_2$ , 400 MHz):  $\delta$  7.61-7.54 (m, 8H), 7.36-7.23 (m, 12H), 6.91 (s, 2H), 6.72 (s, 2H); **HRMS** (APCI) calcd for  $\text{C}_{34}\text{H}_{26}\text{O}_2\text{Cl}_2$   $[(\text{M}+\text{H})^+]$  534.1148, found 534.1140.

### (Z)-4,4'-(1-Phenoxyethene-1,2-diyl)bis(methoxybenzene) (3bt)

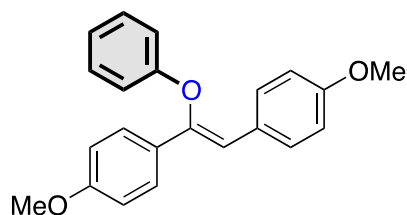

According to the general procedure for hydrophenoxylation, a crude product, which was prepared from alkyne (**1b**) (119.2 mg, 0.50 mmol), phenol (**2t**) (52.0 mg, 0.55 mmol) and  $[\{\text{Au}(\text{IPr})_2(\mu\text{-OH})\}][\text{BF}_4]$  (6.5 mg, 5  $\mu\text{mol}$ , 1.0 mol %) in toluene (1 mL) at 110 °C for 14 h, was purified by column chromatography on silica gel (pentane/EtOAc = 95/5) to give **3bt** (148 mg, 89%, average of two runs) as a off-white solid.

$^1\text{H NMR}$  (300 MHz;  $\text{CDCl}_3$ ):  $\delta$  7.57 (d,  $J$  = 8.8 Hz, 2H), 7.51 (d,  $J$  = 8.8 Hz, 2H), 7.26-7.18 (m, 2H), 7.03 (d,  $J$  = 7.8 Hz, 2H), 6.94 (t,  $J$  = 7.3 Hz, 1H), 6.82 (dd,  $J$  = 9.0, 2.6 Hz, 4H), 6.53 (s, 1H), 3.65 (s, 6H).  $^{13}\text{C}\{^1\text{H}\}$  NMR (101 MHz,  $\text{CDCl}_3$ ):  $\delta$  159.60, 158.68, 156.54, 147.82, 130.16, 129.72, 128.72, 127.85, 127.19, 121.92, 116.26, 114.66, 114.06, 114.03, 55.32, 55.28. HRMS (APCI) calcd for  $\text{C}_{22}\text{H}_{21}\text{O}_3$  [ $\text{M}^+$ ] 333.1485, found 333.1482.

### (Z)-4,4'-(1-Phenoxyethene-1,2-diyl)bis(chlorobenzene) (3ct)

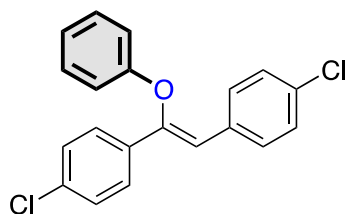

According to the general procedure for hydrophenoxylation, a crude product, which was prepared from alkyne **1c** (123.5 mg, 0.50 mmol), phenol (**2t**) (52.0 mg, 0.55 mmol) and  $[\{\text{Au}(\text{IPr})_2(\mu\text{-OH})\}][\text{BF}_4]$  (6.5 mg, 5  $\mu\text{mol}$ , 1.0 mol %) in toluene (1 mL) at 110 °C for 14 h, was purified by column chromatography on silica gel (pentane/EtOAc = 9/1) to give **3ct** (140 mg, 82%, average of two runs) as a off-white solid.

$^1\text{H NMR}$  (300 MHz;  $\text{CDCl}_3$ ):  $\delta$  7.58-7.54 (m, 2H), 7.52-7.48 (m, 2H), 7.30-7.21 (m, 6H), 6.99-6.95 (m, 3H), 6.58 (s, 1H).  $^{13}\text{C}\{^1\text{H}\}$  NMR (126 MHz,  $\text{CDCl}_3$ ): 155.93, 149.23, 134.54, 134.32, 133.24, 133.06, 130.29, 129.93, 129.01, 128.87, 127.45, 122.57, 116.32, 115.99. HRMS (APCI) calcd for  $\text{C}_{20}\text{H}_{15}\text{Cl}_2\text{O}$  [ $\text{M}^+$ ] 341.0494, found 341.0491.

### (Z)-[(1,4-Dimethoxybut-2-en-2-yl)oxy]benzene (3dt)

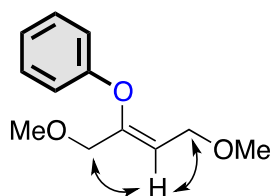

NOESY

According to the general procedure for hydrophenoxylation, a crude product, which was prepared from alkyne **1d** [5] (114.0 mg, 1.00 mmol), phenol (**2t**) (47.0 mg, 0.50 mmol) and  $[\{\text{Au}(\text{IPr})_2(\mu\text{-OH})\}][\text{BF}_4]$  (3.2 mg, 2.5  $\mu\text{mol}$ , 0.5 mol %) in toluene (1 mL) at 80 °C for 2 h, was purified by column chromatography on silica gel (*n*-hexane/EtOAc = 10/1) to give **3dt** (89 mg, 85%, average of two runs) as a colourless liquid.

$^1\text{H NMR}$  ( $\text{CDCl}_3$ , 300 MHz)  $\delta$  7.34-7.23 (m, 2H), 7.08-6.93 (m, 3H), 5.51 (tt,  $J$  = 6.4, 0.9 Hz, 1H), 4.02 (dt,  $J$  = 6.4, 0.9 Hz, 2H), 3.91 (dt,  $J$  = 0.9 Hz, 2H), 3.35 (s, 3H), 3.31 (s, 3H);  $^{13}\text{C}\{^1\text{H}\}$  NMR ( $\text{CDCl}_3$ , 75 MHz)  $\delta$  156.3, 149.9, 129.7, 122.5, 116.5, 114.9, 70.6, 66.4, 58.4, 58.2; HRMS (APCI) calcd for  $\text{C}_{12}\text{H}_{16}\text{O}_3$  [ $\text{M}^+$ ] 208.1094, found 208.1093.

### (Z)-2,2'-(1-Phenoxyethene-1,2-diyl)dithiophene (3et)

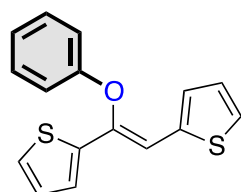

According to the general procedure for hydrophenoxylation, a crude product, which was prepared from alkyne **1e** [6] (95.0 mg, 0.50 mmol), phenol (**2t**) (52.0 mg, 0.55 mmol) and  $[\{\text{Au}(\text{IPr})_2(\mu\text{-OH})\}][\text{BF}_4]$  (6.5 mg, 5  $\mu\text{mol}$ , 1.0 mol %) in toluene (1 mL) at 110 °C for 1 h, was purified by column chromatography on silica gel (*n*-hexane/EtOAc = 9/1) to give **3et** (91 mg, 64%, average of two runs) as a off-white solid.

$^1\text{H NMR}$  ( $\text{CDCl}_3$ , 400 MHz)  $\delta$  7.31-7.24 (m, 2H), 7.23-7.20 (m, 1H), 7.19 (ddd,  $J$  = 5.0, 1.0, 1.0 Hz, 1H), 7.17-7.13 (m, 1H), 7.10-7.07 (m, 3H), 7.04-6.95 (m, 3H), 6.94-6.90 (m, 1H);  $^{13}\text{C}\{^1\text{H}\}$  NMR ( $\text{CDCl}_3$ , 101 MHz)  $\delta$  156.0, 142.8, 139.1, 137.0, 129.8, 127.9, 127.7, 127.0, 126.6, 125.6, 125.4, 122.6, 116.0, 110.6; HRMS (APCI) calcd for  $\text{C}_{16}\text{H}_{13}\text{OS}_2$  [ $\text{M}+\text{H}^+$ ] 285.0402, found 285.0397.



### (Z)-2,2'-(1-Phenoxyethene-1,2-diyl)bis(chlorobenzene) (**3ft**)

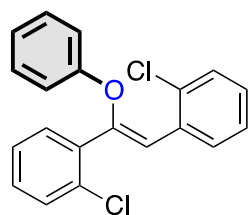

According to the general procedure for hydrophenoxylation, a crude product, which was prepared from alkyne **1f** (123.0 mg, 0.50 mmol), phenol (**2t**) (47.0 mg, 0.50 mmol) and  $[\{\text{Au}(\text{IPr})_2(\mu\text{-OH})\}[\text{BF}_4]]$  (3.2 mg, 2.5  $\mu\text{mol}$ , 0.5 mol %) in toluene (1 mL) at 80 °C for 6 h, was purified by column chromatography on silica gel (pentane), to give **3ft** (148 mg, 87%, average of two runs) as a colourless oil.

$^1\text{H NMR}$  ( $\text{CDCl}_3$ , 300 MHz)  $\delta$  8.18-8.15 (m, 1H), 7.66-7.62 (m, 1H), 7.50-7.47 (m, 1H), 7.44-7.41 (m, 1H), 7.33-7.10 (m, 6H), 7.17-7.13 (m, 2H), 7.05-7.00 (m, 1H), 6.93 (s, 1H);  $^{13}\text{C}\{^1\text{H}\}$  NMR ( $\text{CDCl}_3$ , 75 MHz)  $\delta$  155.7, 148.7, 136.1, 134.9, 133.6, 132.9, 132.6, 131.1, 130.6, 130.0, 129.8, 129.5, 128.5, 126.8, 126.5, 122.8, 117.6, 116.2; **HRMS** (ESI) calcd for  $\text{C}_{20}\text{H}_{15}\text{OCl}_2$   $[(\text{M}+\text{H})^+]$  341.0494, found 341.0495.

### (Z)-(2-Phenoxybut-1-en-1-yl)benzene and (Z)-(1-phenoxybut-1-en-1-yl)benzene (**3it** /**3it'** = 1/0.23)

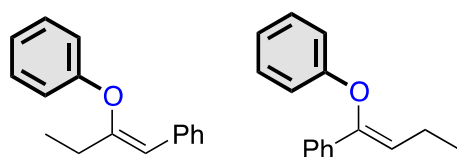

According to the general procedure for hydrophenoxylation, a crude product, which was prepared from **1i** (65.0 mg, 0.50 mmol), phenol (**2t**) (52.0 mg, 0.55 mmol) and  $[\text{Au}(\text{IPr})_2(\mu\text{-OH})][\text{BF}_4]$  (3.2 mg, 2.5  $\mu\text{mol}$ , 0.5 mol %) in toluene (1 mL) at 80 °C for 6 h, was purified by column chromatography

on silica gel (pentane/EtOAc = 95/5) to give the inseparable mixture of **3it** and **3it'** (**3it** /**3it'** = 1/0.23, 90 mg, 80%, average of two runs) as a colourless liquid.

$^1\text{H NMR}$  (400 MHz;  $\text{CDCl}_3$ ):  $\delta$  7.54-7.52 (m, 2H), 7.51-7.48 (m, 0.6H), 7.33-7.21 (m, 6H), 7.17-7.13 (m, 1H), 7.06 (t,  $J = 1.1$  Hz, 0.32H), 7.04-7.01 (m, 3H), 6.98-6.95 (m, 0.5H), 6.93-6.91 (m, 0.15H), 5.94 (s, 1H), 5.87 (t,  $J = 7.3$  Hz, 0.23H), 2.31 (qd,  $J = 7.4$ , 0.8 Hz, 2H), 2.23 (quintet,  $J = 7.5$  Hz, 0.48H), 1.14 (t,  $J = 7.4$  Hz, 3H), 1.04 (t,  $J = 7.5$  Hz, 0.74H).  $^{13}\text{C}\{^1\text{H}\}$  NMR (126 MHz;  $\text{CDCl}_3$ ):  $\delta$  157.61, 155.53, 154.39, 148.36, 135.56, 135.22, 129.73, 129.62, 128.54, 128.45, 128.38, 127.92, 126.68, 125.32, 122.44, 121.43, 119.87, 117.32, 115.48, 114.06, 26.41, 19.47, 13.97, 11.96. **HRMS** (APCI) calcd. for  $\text{C}_{16}\text{H}_{17}\text{O}$   $[(\text{M}+\text{H})^+]$  225.1274, found 225.1271.

### (Z)-1-Methoxy-4-((1-phenylprop-1-en-2-yl)oxy)benzene and (Z)-1-methoxy-4-((1-phenylprop-1-en-1-yl)oxy)benzene (**3ju** /**3ju'** = 1/0.22)

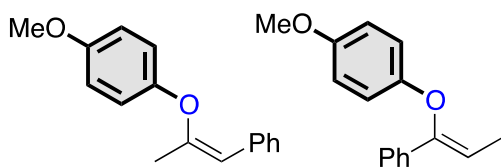

According to the general procedure for hydrophenoxylation, a crude product, which was prepared from **1j** (58.0 mg, 0.50 mmol), phenol **2u** (68.3 mg, 0.55 mmol) and  $[\text{Au}(\text{IPr})_2(\mu\text{-OH})][\text{BF}_4]$  (3.2 mg, 2.5  $\mu\text{mol}$ , 0.5 mol %) in toluene (1 mL) at 80 °C for 6 h, was purified by column

chromatography on silica gel (*n*-hexane/EtOAc = 95/5) to give the inseparable mixture of **3ju** and **3ju'** (**3ju** /**3ju'** = 1/0.22, 104 mg, 87%, average of two runs) as a colourless liquid.

$^1\text{H NMR}$  (400 MHz;  $\text{CDCl}_3$ ):  $\delta$  7.58-7.55 (m, 2H), 7.49-7.46 (m, 0.45), 7.30-7.23 (m, 3H), 7.17-7.13 (m, 1H), 6.99-6.95 (m, 2H), 6.91-6.83 (m, 3H), 6.79-6.76 (m, 0.40), 5.89 (q,  $J = 7.0$  Hz, 0.23), 5.78 (s, 1H), 3.79 (s, 3H), 3.73 (s, 0.62H), 1.93 (s, 3H), 1.77 (d,  $J = 7.0$  Hz, 0.62H).  $^{13}\text{C}\{^1\text{H}\}$  NMR (126 MHz;  $\text{CDCl}_3$ ):  $\delta$  155.50, 154.23, 151.33, 150.17, 150.09, 149.03, 135.75, 135.62, 128.50, 128.41, 128.16, 127.84, 126.38, 125.32, 121.65, 119.23, 116.17, 114.77, 114.75, 113.55, 112.35, 110.03, 108.34, 55.75, 55.71, 19.69, 11.52. **HRMS** (APCI) calcd. for  $\text{C}_{16}\text{H}_{17}\text{O}_2$   $[(\text{M}+\text{H})^+]$  241.1223, found 241.1223.

**(Z)-3-(2-Phenoxyhex-1-en-1-yl)pyridine (3nt) and (Z)-3-(1-phenoxyhex-1-en-1-yl)pyridine (3nt') (3nt/3nt' = 1/0.43)**

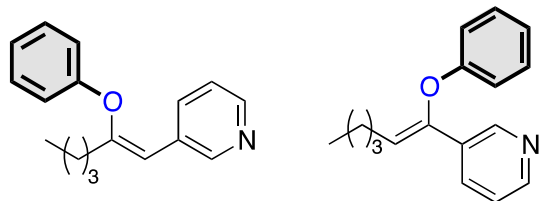

According to the general procedure for hydrophenoxylation, a crude product, which was prepared from alkyne **1n** (79.0 mg, 0.50 mmol), phenol (**2t**) (47.0 mg, 0.50 mmol) and  $[\{\text{Au}(\text{IPr})_2(\mu\text{-OH})\}][\text{BF}_4]$  (19.5 mg, 15  $\mu\text{mol}$ , 3.0 mol %) in toluene (1 mL) at 110 °C for 24 h, was purified by column chromatography on silica

gel (*n*-hexane/EtOAc = 95/5~70/30) to give **3nt** and **3nt'** (**3nt** / **3nt'** = 1/0.43, 96 mg, 76%, average of two runs) as a pale yellow oil.

$^1\text{H NMR}$  ( $\text{CDCl}_3$ , 300 MHz)  $\delta$  8.77 (d,  $J$  = 1.8 Hz, 1H), 8.63 (br, 2.25H), 8.45 (dd,  $J$  = 4.7, 1.4 Hz, 1H), 8.36 (d,  $J$  = 3.7 Hz, 2.33H), 7.94 (dt,  $J$  = 8.1, 1.9 Hz, 2.36H), 7.71 (dt,  $J$  = 8.0, 2.0 Hz, 1H), 7.34-7.12 (m, 12H), 7.08-6.92 (m, 10H), 5.95-5.89 (m, 1+2.21H), 2.33-2.20 (m, 6.62H), 1.58-1.21 (m, 15.38H), 0.89 (t,  $J$  = 7.3 Hz, 10.38H);  $^{13}\text{C}\{^1\text{H}\}$  NMR ( $\text{CDCl}_3$ , 75 MHz)  $\delta$  157.0, 155.7, 155.1, 149.7, 148.8, 147.5, 147.1, 146.4, 134.9, 132.6, 131.3, 129.8, 129.8, 123.5, 123.3, 122.9, 121.9, 120.4, 117.4, 115.6, 111.2, 32.9, 31.4, 29.3, 25.7, 22.6, 22.2, 14.0, 14.0. HRMS (ESI) calcd for  $\text{C}_{17}\text{H}_{20}\text{O}_1\text{N}_1$   $[(\text{M}+\text{H})^+]$  254.1539, found 254.1541.

**(Z)-[4-(Benzyloxy)but-2-en-2-yl]oxy]benzene (3ot)**

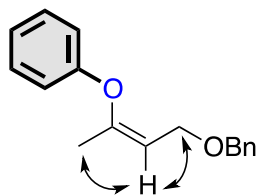

NOESY

According to the general procedure for hydrophenoxylation, a crude product, which was prepared from alkyne **1o** [7] (160.0 mg, 1.00 mmol), phenol (**2t**) (47.0 mg, 0.50 mmol) and  $[\{\text{Au}(\text{IPr})_2(\mu\text{-OH})\}][\text{BF}_4]$  (3.2 mg, 2.5  $\mu\text{mol}$ , 0.5 mol %) in toluene (1 mL) at 80 °C for 2 h, was purified by column chromatography on silica gel (*n*-hexane/EtOAc = 95/5) to give **3ot** (89 mg, 70%, average of two runs) as a colourless liquid.

$^1\text{H NMR}$  ( $\text{CDCl}_3$ , 300 MHz)  $\delta$  7.34-7.18 (m, 7H), 7.03-6.94 (m, 1H), 6.94-6.86 (m, 2 H), 5.21 (t,  $J$  = 6.8 Hz, 1H), 4.43 (s, 2H), 4.06 (d,  $J$  = 6.8 Hz, 2H), 1.81 (s, 3H);  $^{13}\text{C}\{^1\text{H}\}$  NMR ( $\text{CDCl}_3$ , 101 MHz)  $\delta$  156.1, 150.9, 138.6, 129.7, 128.4, 127.9, 127.6, 122.4, 117.0, 112.6, 72.4, 64.5, 18.6; HRMS (APCI) calcd for  $\text{C}_{17}\text{H}_{19}\text{O}_2$   $[(\text{M}+\text{H})^+]$  255.1380, found 255.1375.

**(Z)-[5-(Benzyloxy)pent-2-en-2-yl]oxy]benzene (3pt) and (Z)-[5-(benzyloxy)pent-2-en-3-yl]oxy]benzene (3pt') (3pt/3pt' = 1/0.17)**

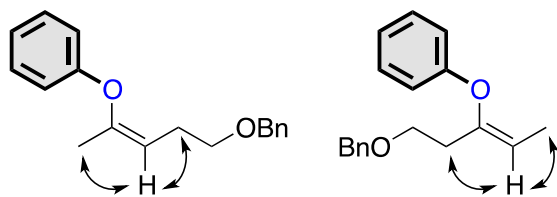

NOESY

NOESY

According to the general procedure for hydrophenoxylation, a crude product, which was prepared from alkyne **1p** [8] (87.0 mg, 0.50 mmol), phenol (**2t**) (52.0 mg, 0.55 mmol) and  $[\{\text{Au}(\text{IPr})_2(\mu\text{-OH})\}][\text{BF}_4]$  (3.2 mg, 2.5  $\mu\text{mol}$ , 0.5 mol %) in toluene (1 mL) at 80 °C for 3 h, was purified by column chromatography on silica gel (*n*-hexane/EtOAc = 95/5) to give **3pt** and **3pt'** (**3pt** / **3pt'** = 1/0.17, 114 mg, 85%, average of

two runs) as a colourless liquid.

$^1\text{H NMR}$  ( $\text{CDCl}_3$ , 300 MHz)  $\delta$  7.33-7.14 (m, 7+1.19H), 6.96-6.80 (m, 3+0.51H), 5.12 (q,  $J$  = 6.7 Hz, 0.17 H), 5.03 (tq,  $J$  = 7.2, 1.1 Hz, 1H), 4.43 (s, 2H), 4.42 (s, 0.34H), 3.51 (t,  $J$  = 6.7 Hz, 0.34H), 3.41 (t,  $J$  = 7.2 Hz, 2H), 2.45-2.36 (m, 0.34H), 2.31 (dtq,  $J$  = 7.2, 7.2 1.1 Hz, 2H), 1.75 (dt,  $J$  = 7.2, 1.1 Hz, 3H), 1.50-1.47 (m, 0.51H);  $^{13}\text{C}\{^1\text{H}\}$  NMR ( $\text{CDCl}_3$ , 75 MHz)  $\delta$  156.6, 156.4, 148.6, 148.4, 138.7, 138.5, 129.6, 129.6, 128.5, 128.4, 127.8, 127.8, 127.7, 127.6, 121.8, 121.6, 116.4, 115.9, 112.7, 112.3, 73.0, 72.8, 69.8, 67.5, 33.5, 26.0, 18.5, 10.9.

### 3. References

- [1] a) R. S. Ramón, S. Gaillard, A. Poater, L. Cavallo, A. M. Z. Slawin, S. P. Nolan, *Chem. Eur. J.* **2011**, *17*, 1238-1246; b) A. Gómez-Suárez, Y. Oonishi, S. Meiries, S. P. Nolan, *Organometallics* **2013**, *32*, 1106-1111.
- [2] Y. Oonishi, A. Gomez-Suarez, A. R. Martin, Y. Makida, A. M. Slawin, S. P. Nolan, *Chem. Eur. J.* **2014**, *20*, 13507-13510.
- [3] M. R. Kuram, M. Bhanuchandra, A. K. Sahoo, *J. Org. Chem.* **2010**, *75*, 2247-2258.
- [4] H. Hiranuma, S. I. Miller, *J. Org. Chem.* **1982**, *47*, 5083-5088.
- [5] P. Chuentragool, K. Vongnam, P. Rashatasakhon, M. Sukwattanasinitt, S. Wacharasindhu, *Tetrahedron* **2011**, *67*, 8177-8182.
- [6] K. Semba, T. Fujihara, J. Terao, Y. Tsuji, *Chem. Eur. J.* **2012**, *18*, 4179-4184.
- [7] F. Alonso, I. Osante, M. Yus, *Tetrahedron* **2007**, *63*, 93-102.

## 4. NMR Spectra

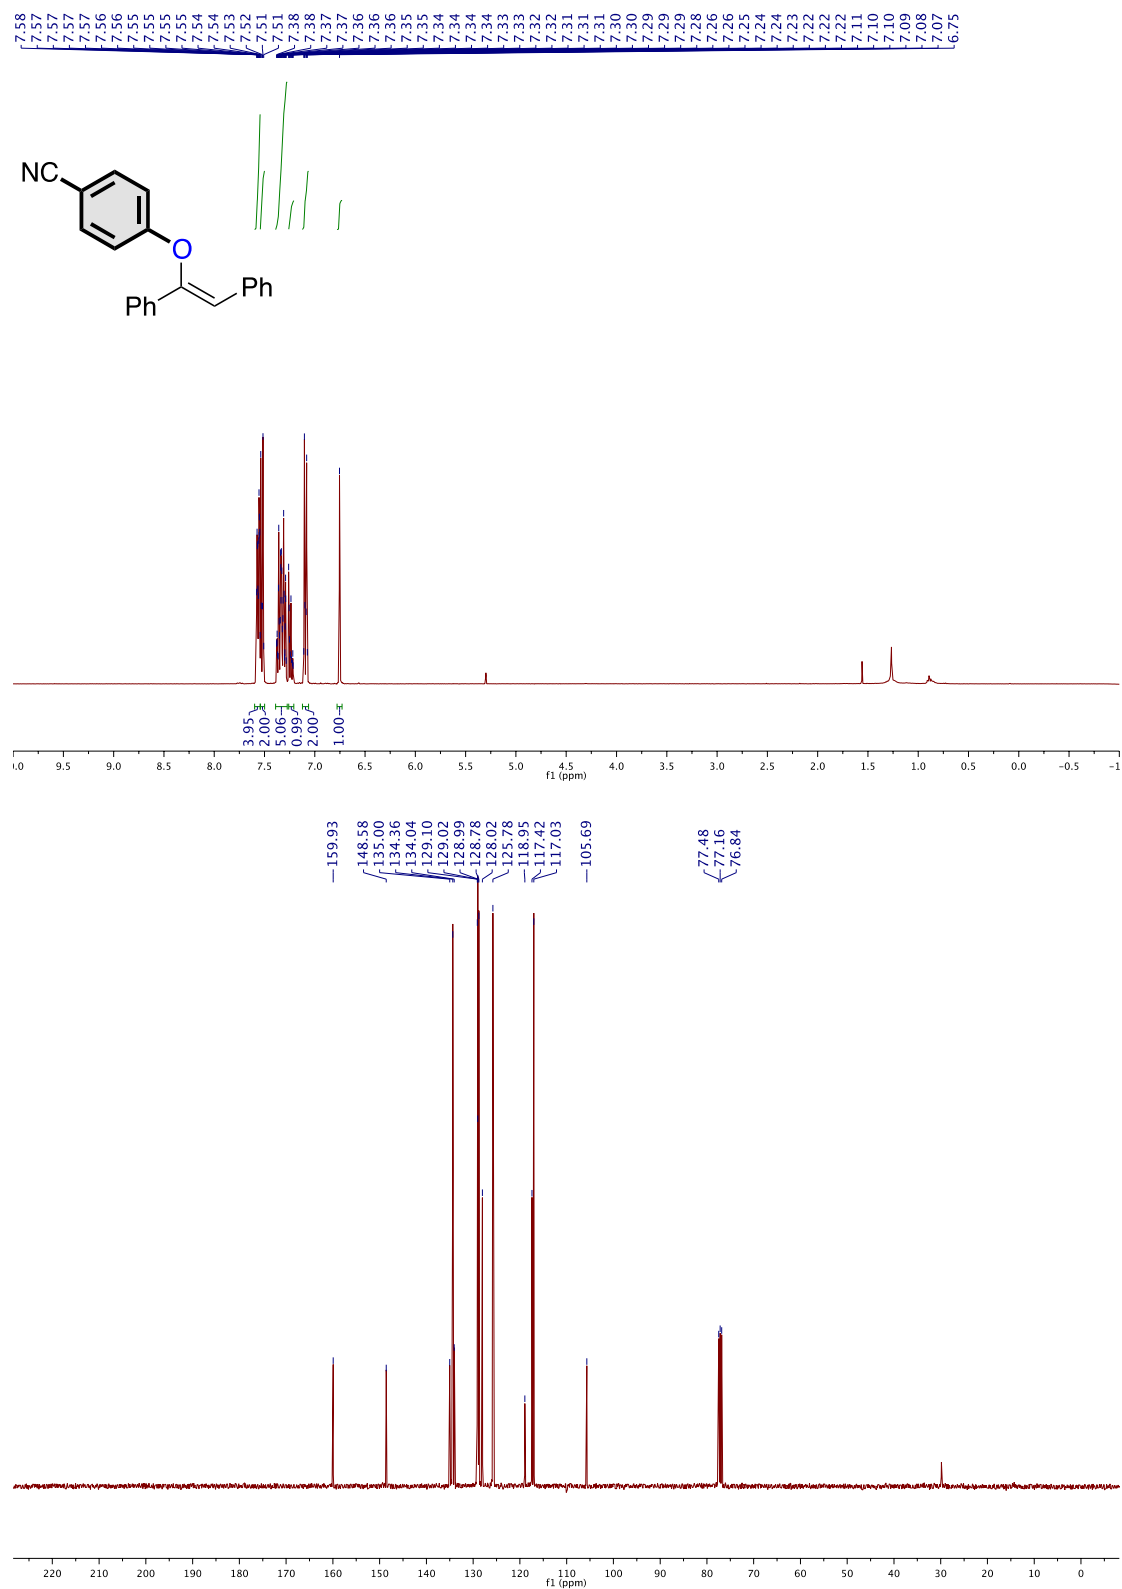

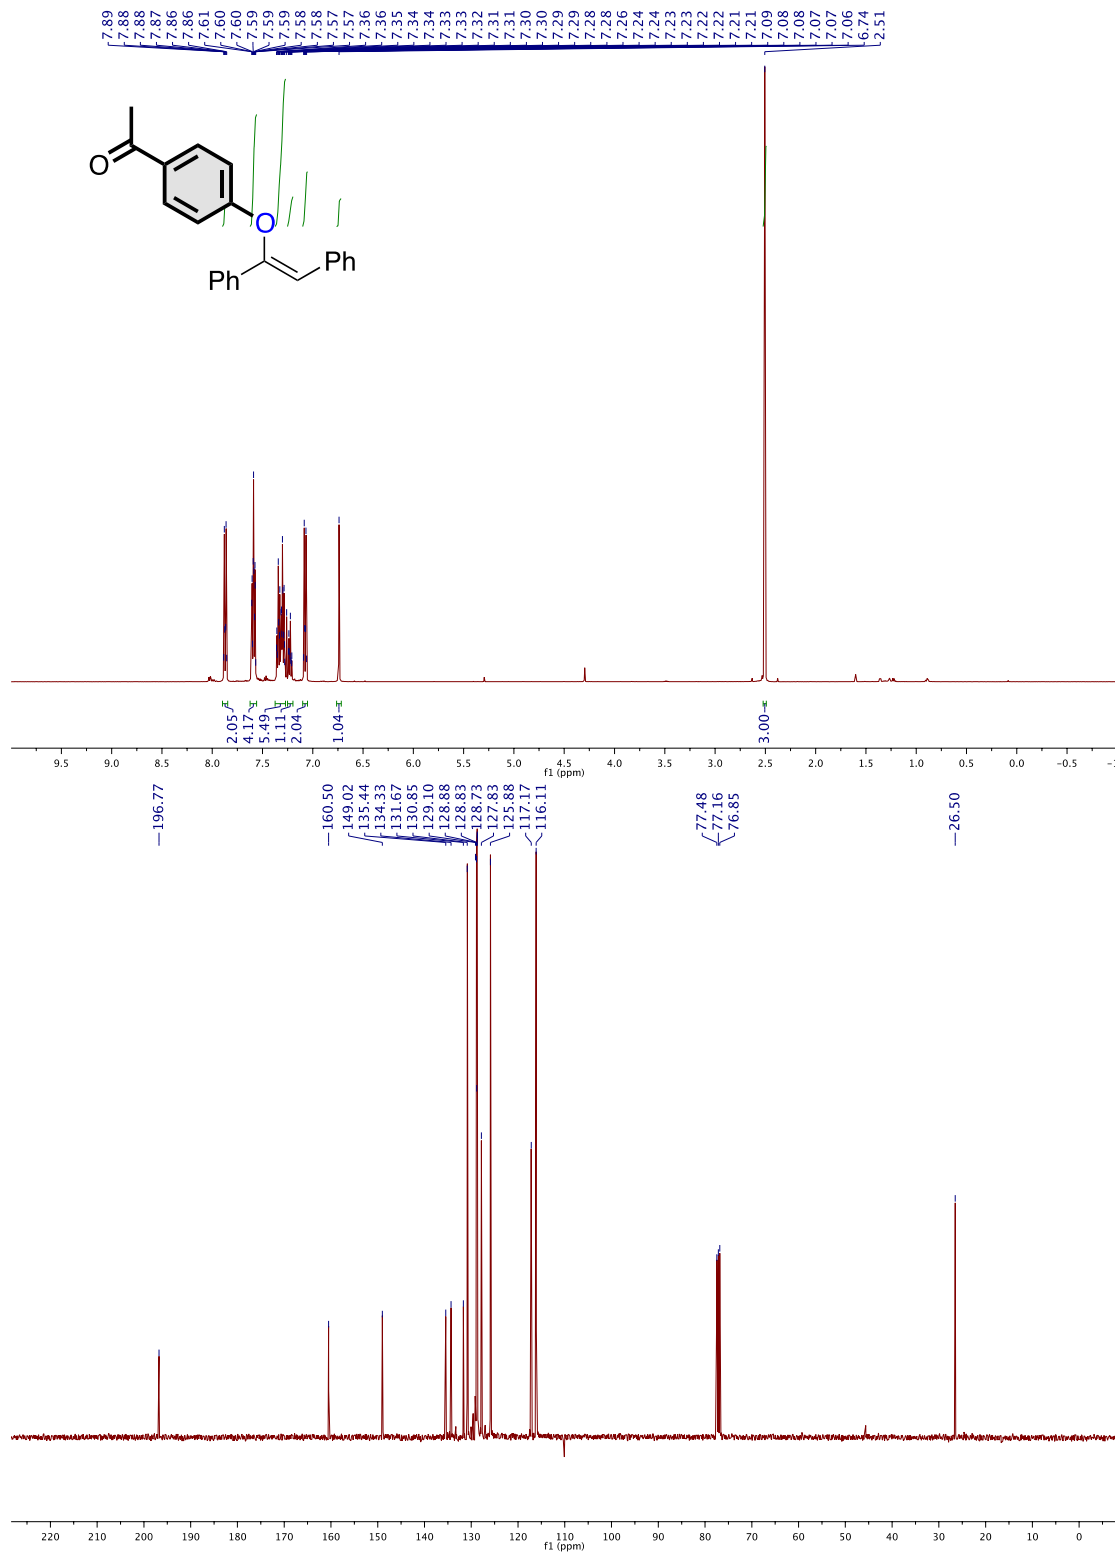

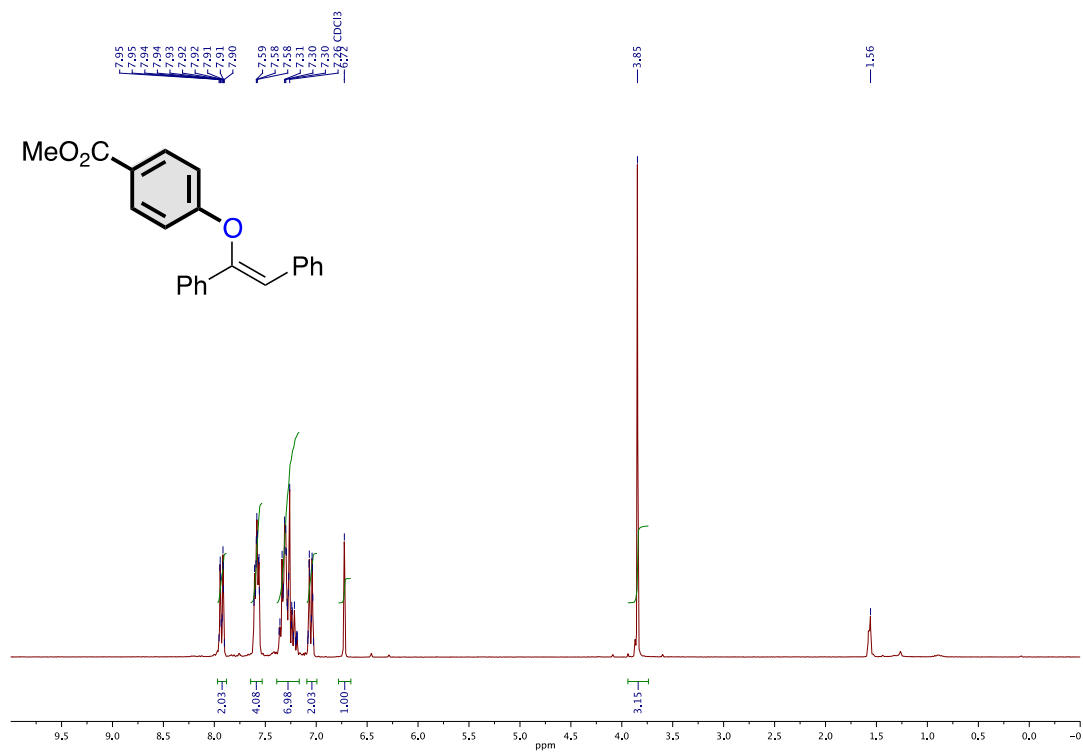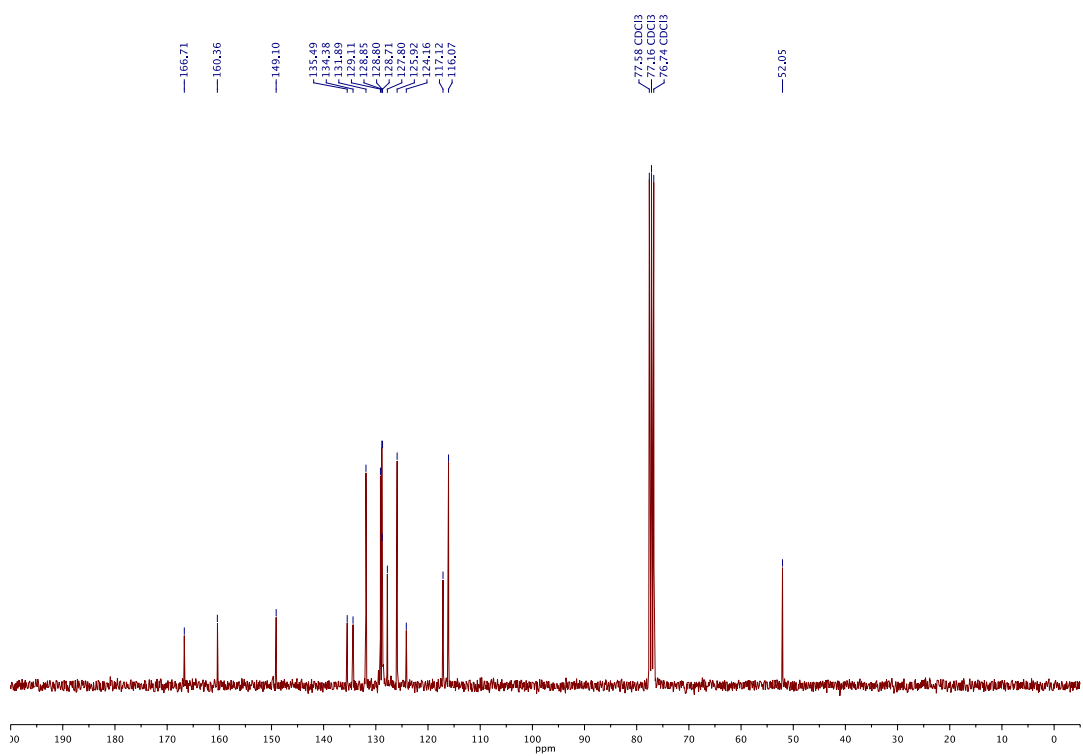

03072013-13-anthonyMI  
AM-2-121  
CD2Cl2

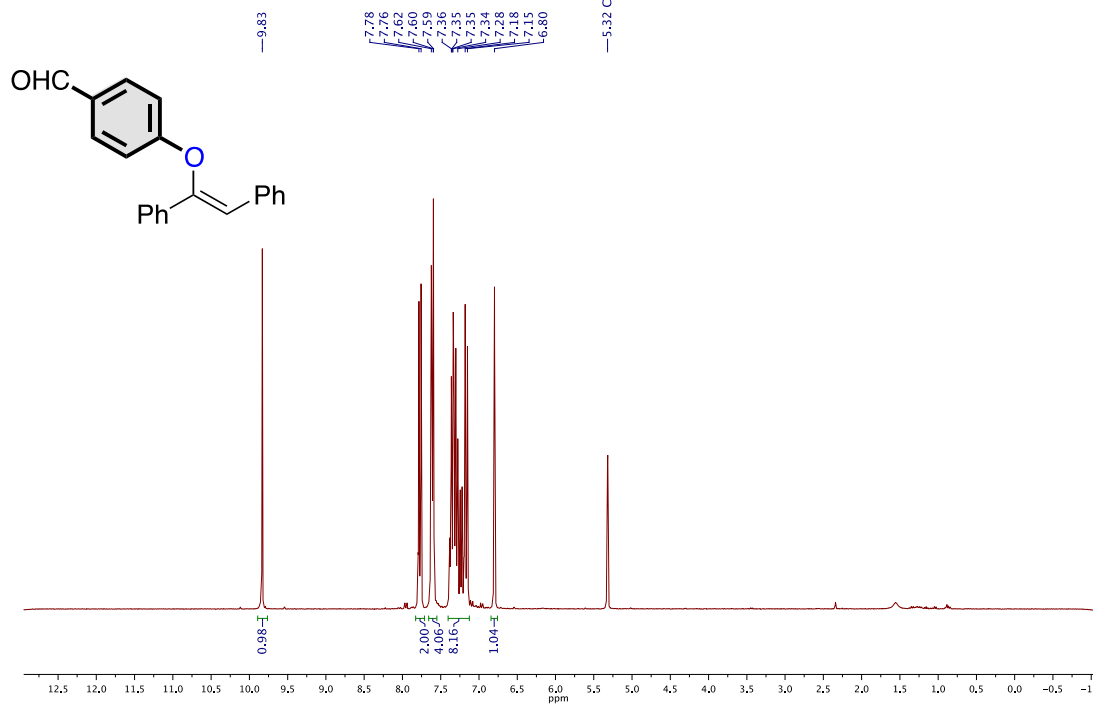

03092013-39-anthonyMR  
AM-2-120  
CD2Cl2

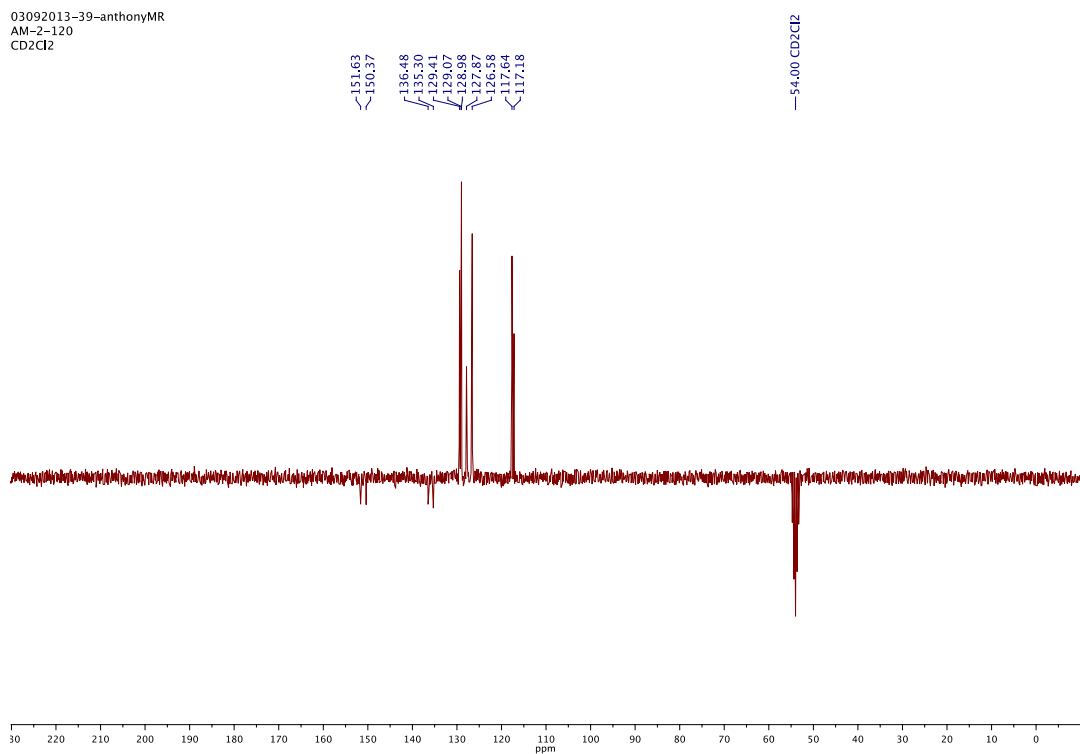

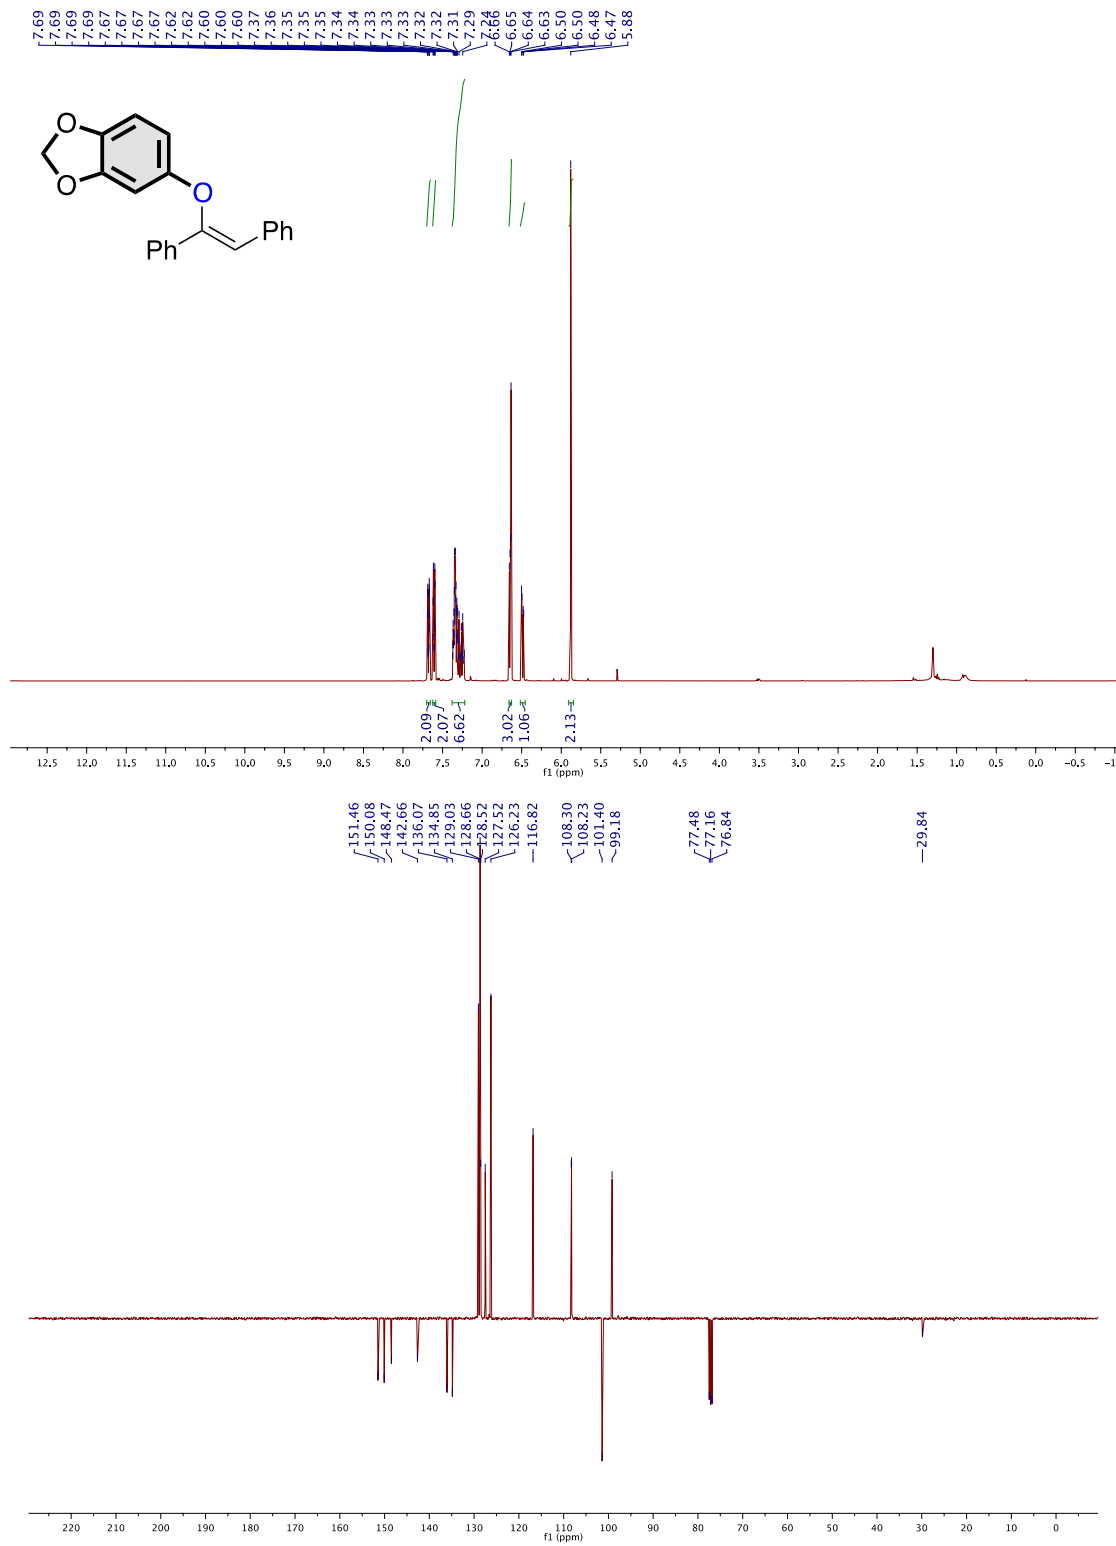



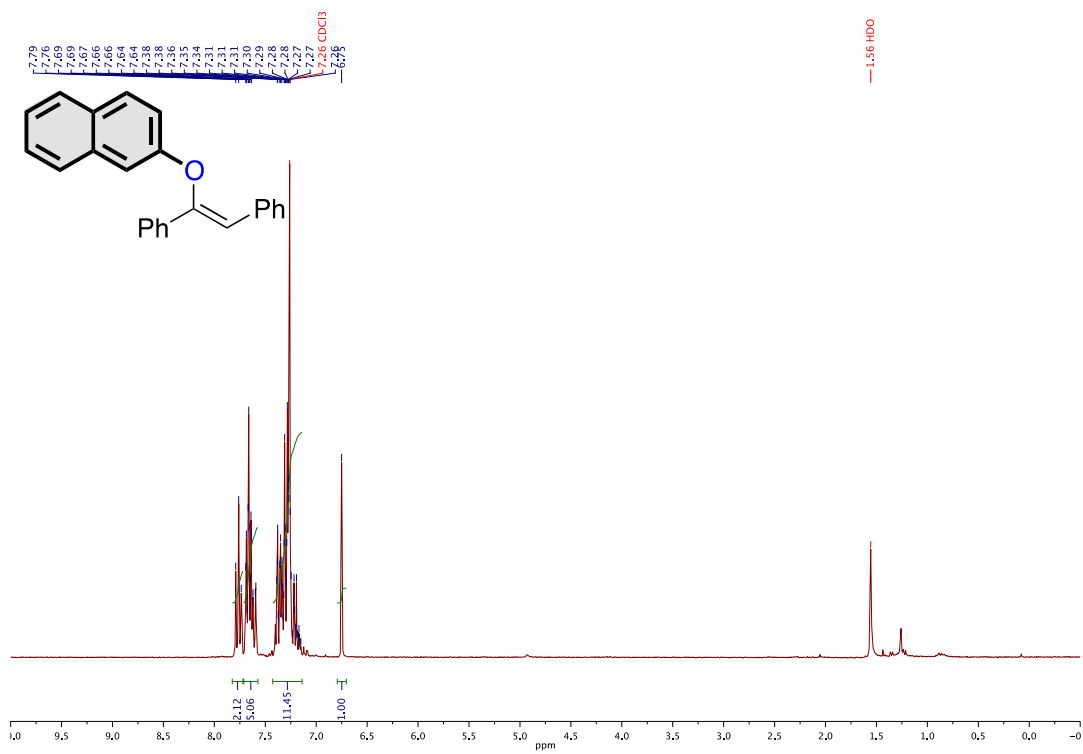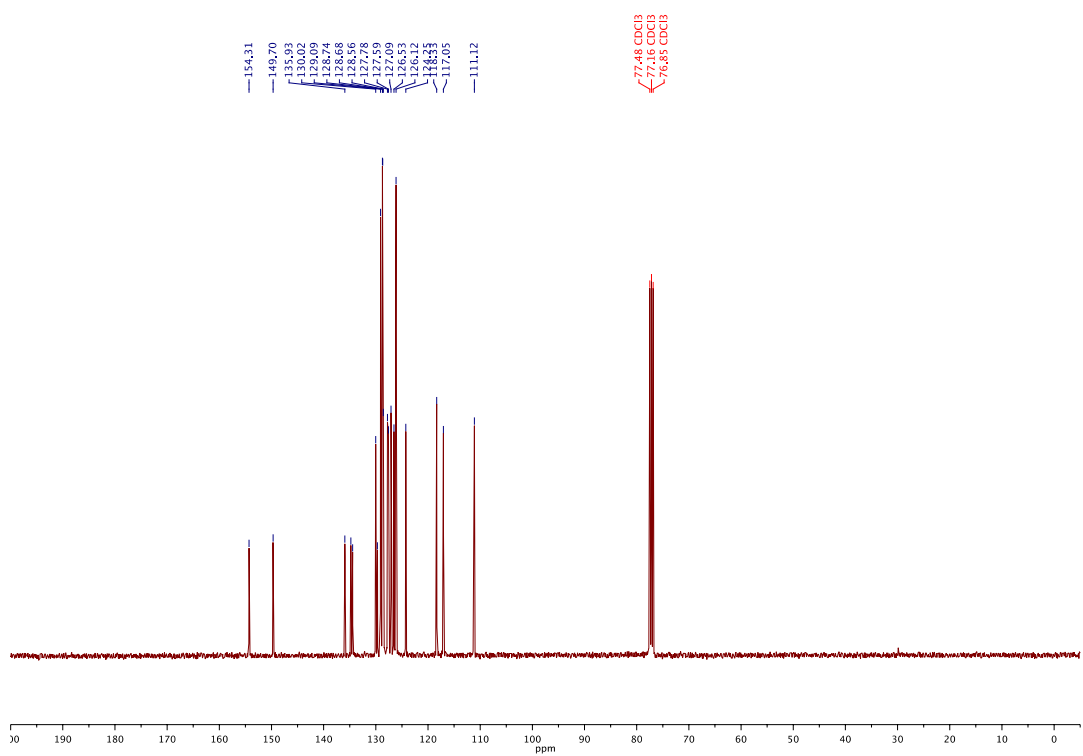

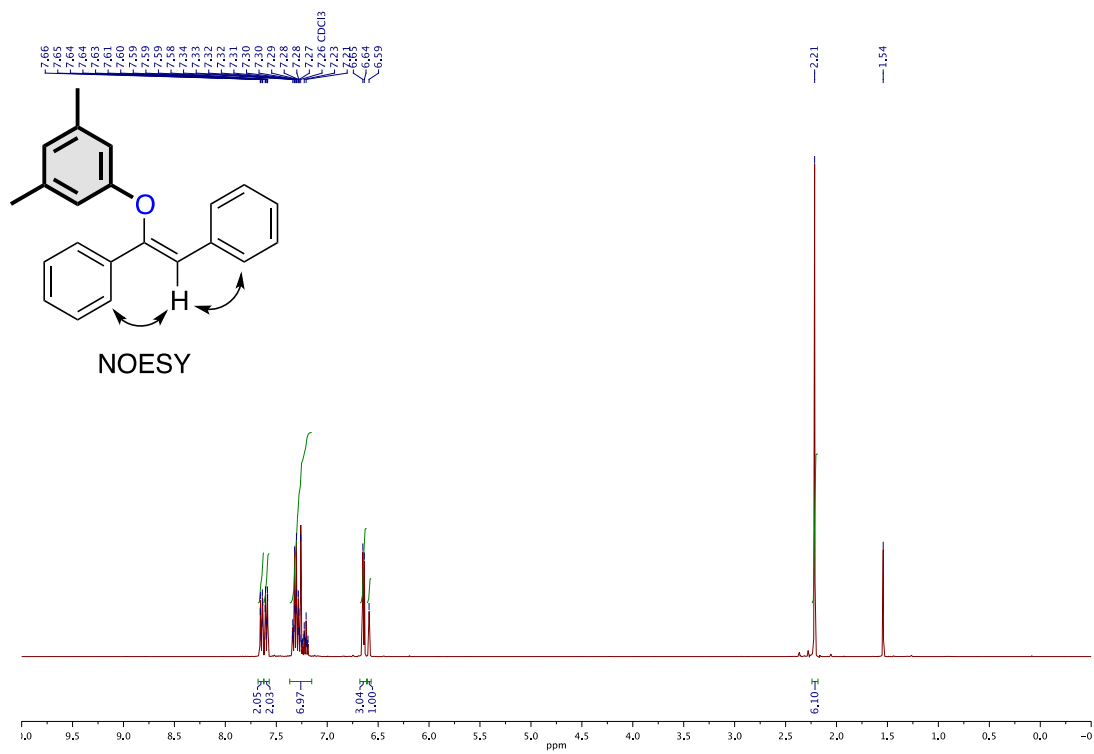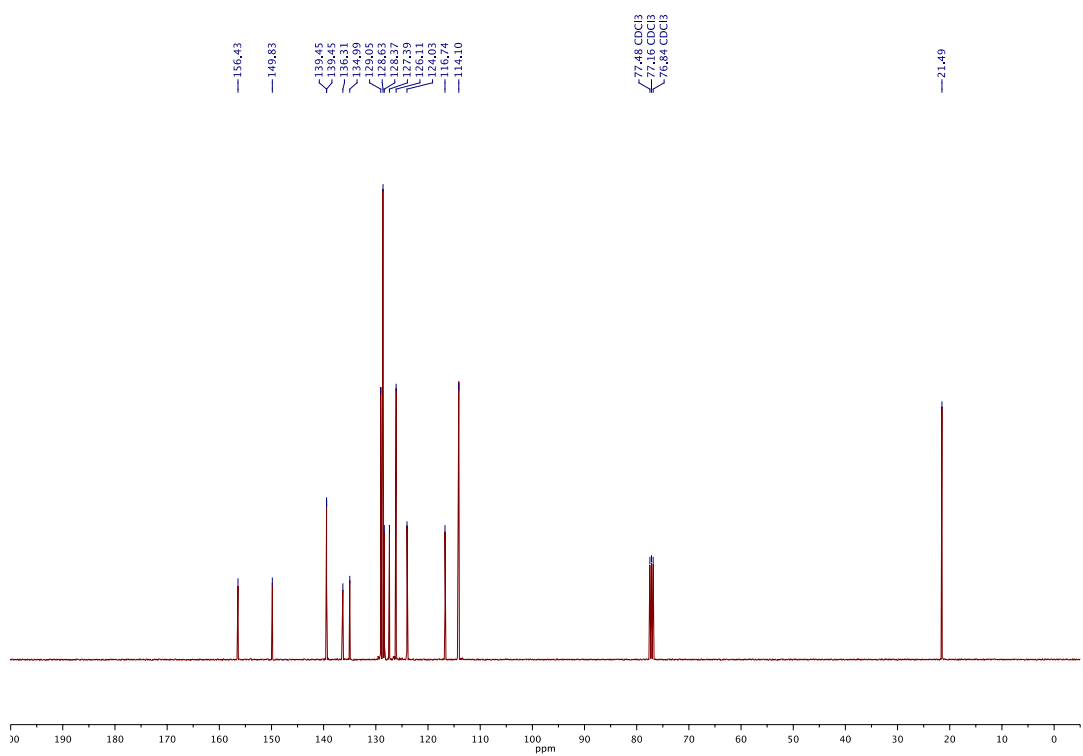

03192013-4-anthonyMR  
AM-2-132

CDCl<sub>3</sub>

7.668  
7.666  
7.665  
7.663  
7.661  
7.610  
7.338  
7.337  
7.336  
7.334  
7.333  
7.332  
7.331  
7.27  
7.26 CDCl<sub>3</sub>  
6.86  
6.69

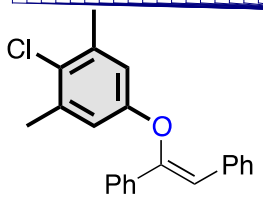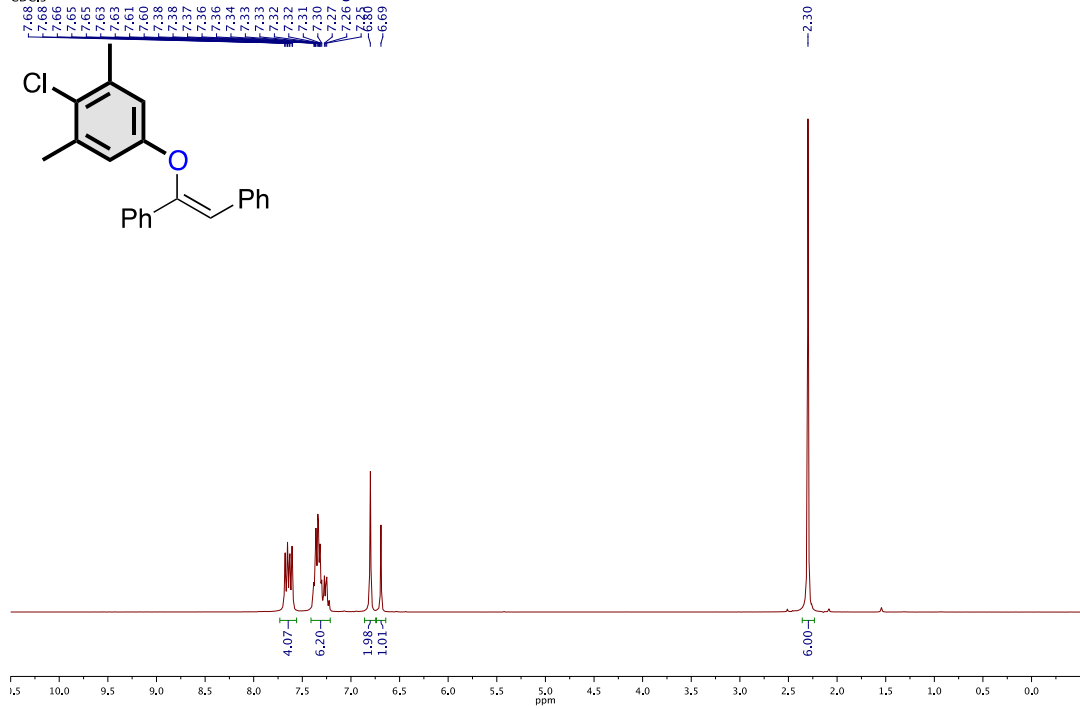

03192013-4-anthonyMR  
AM-2-132

CDCl<sub>3</sub>

154.15  
149.53  
137.57  
135.93  
134.75  
129.05  
128.74  
128.70  
118.98  
116.17

77.16 CDCl<sub>3</sub>

21.10

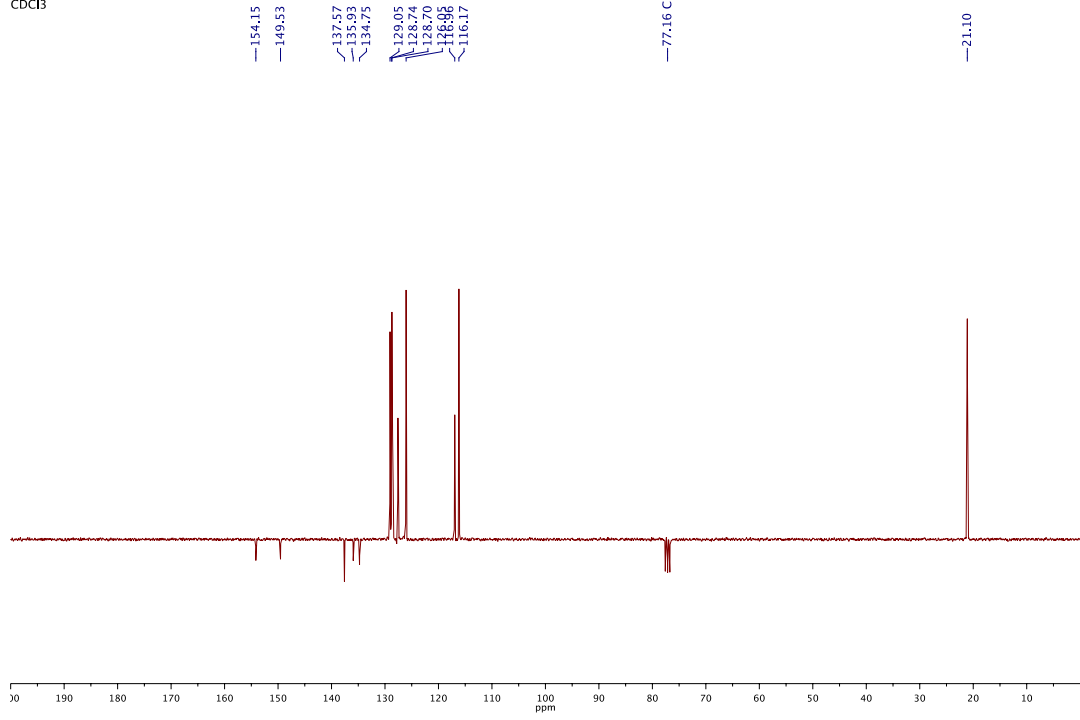

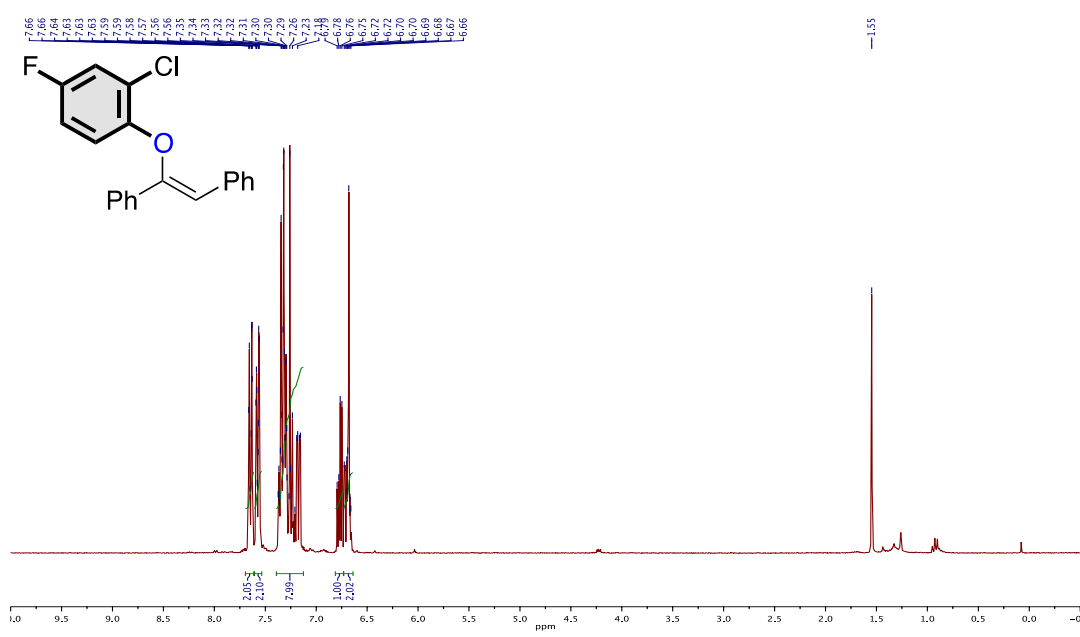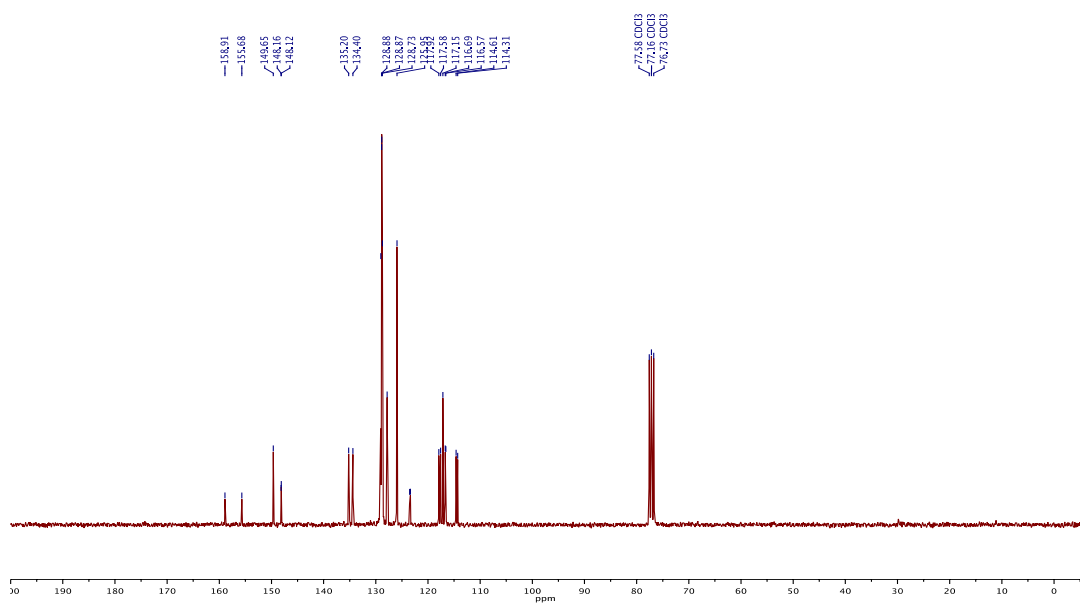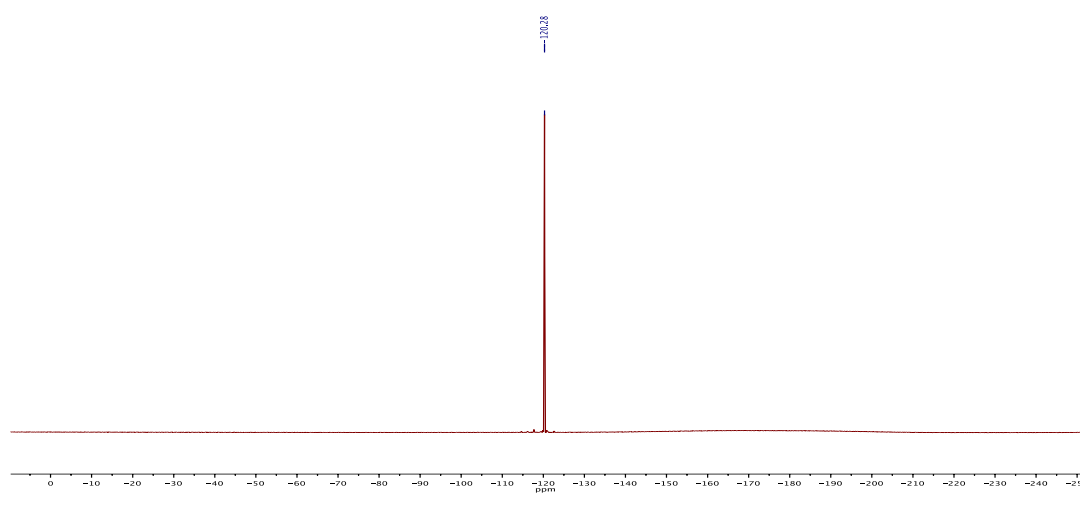

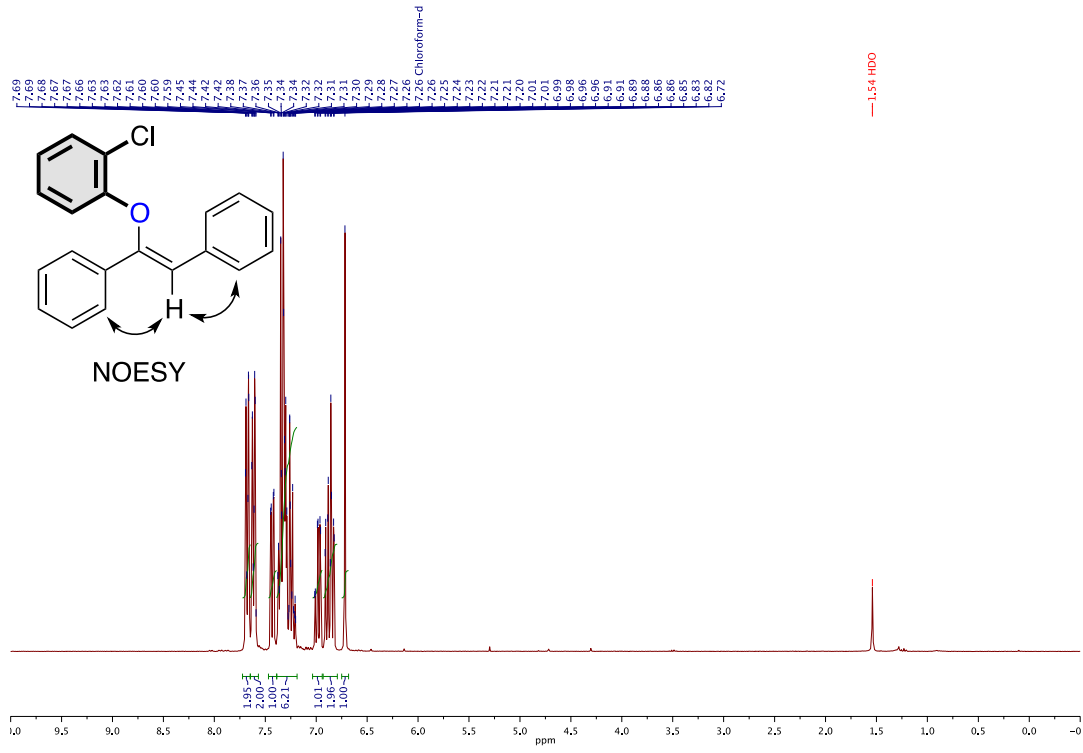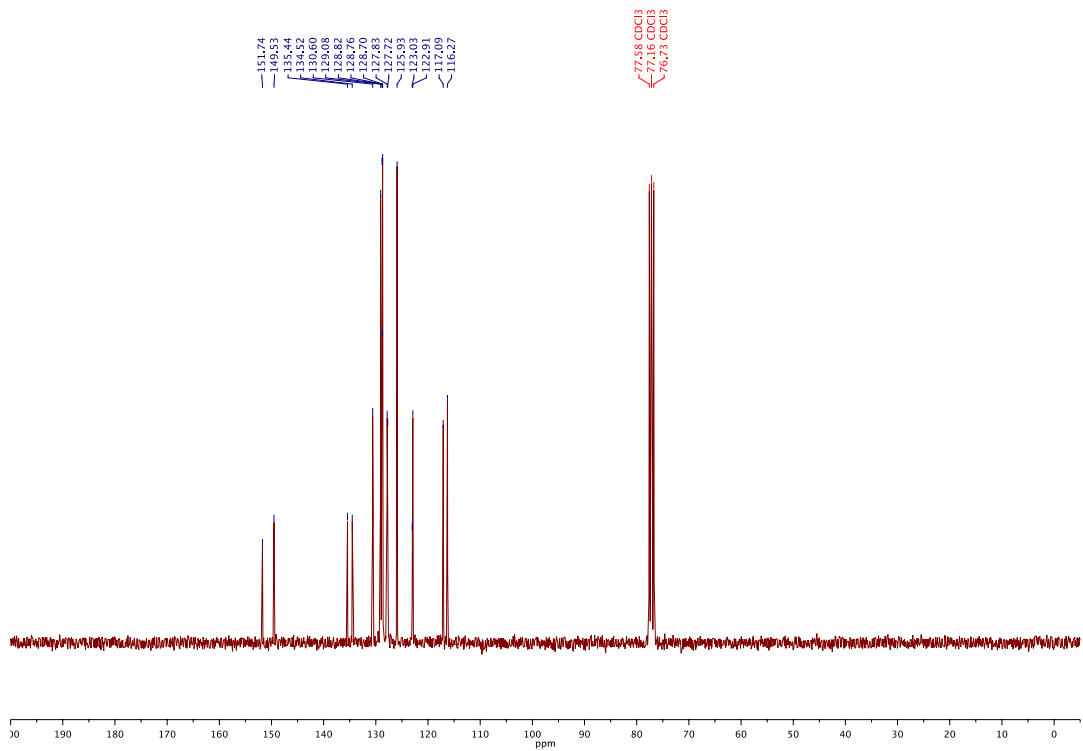

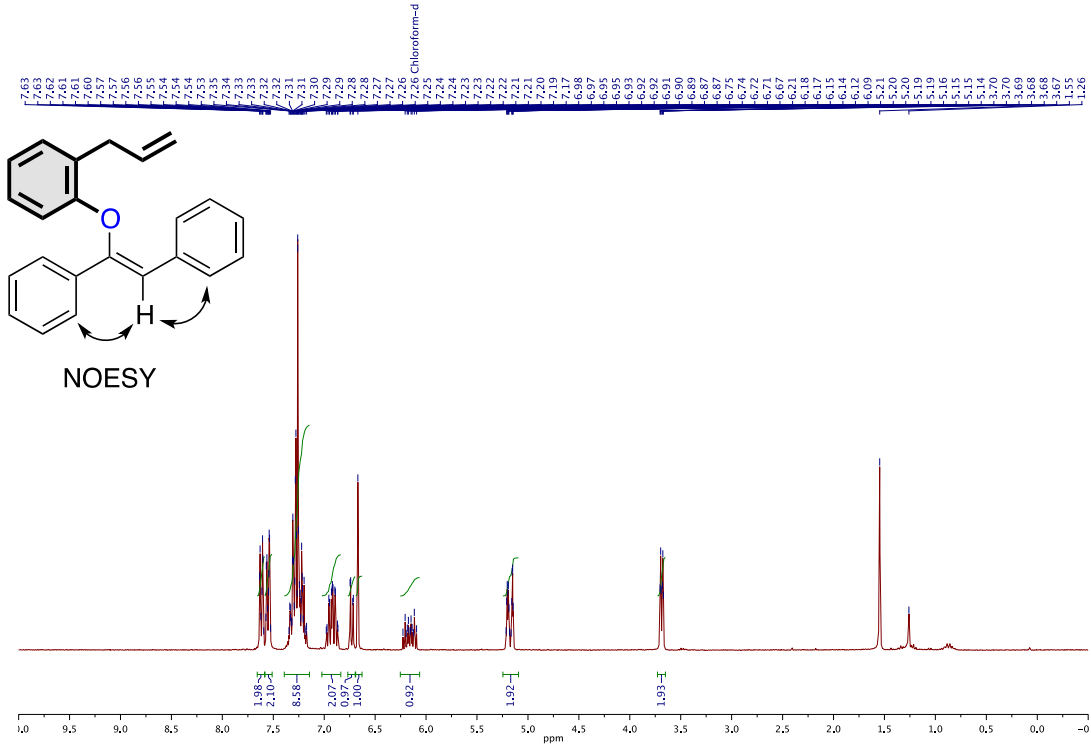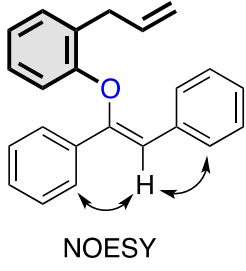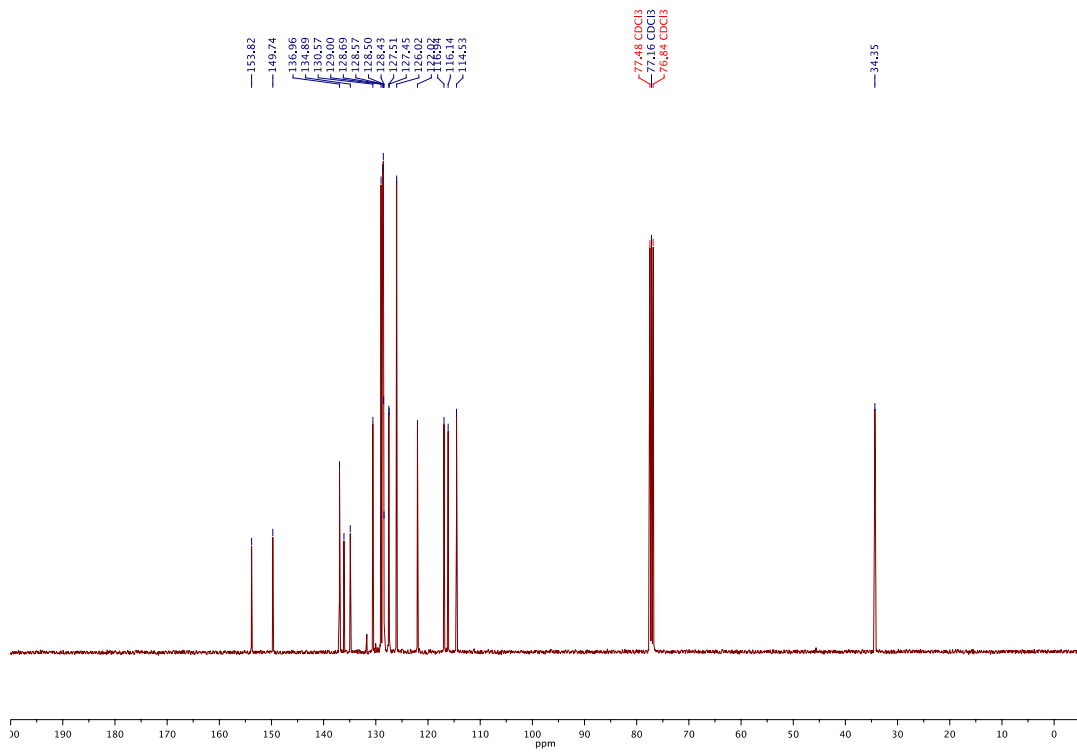

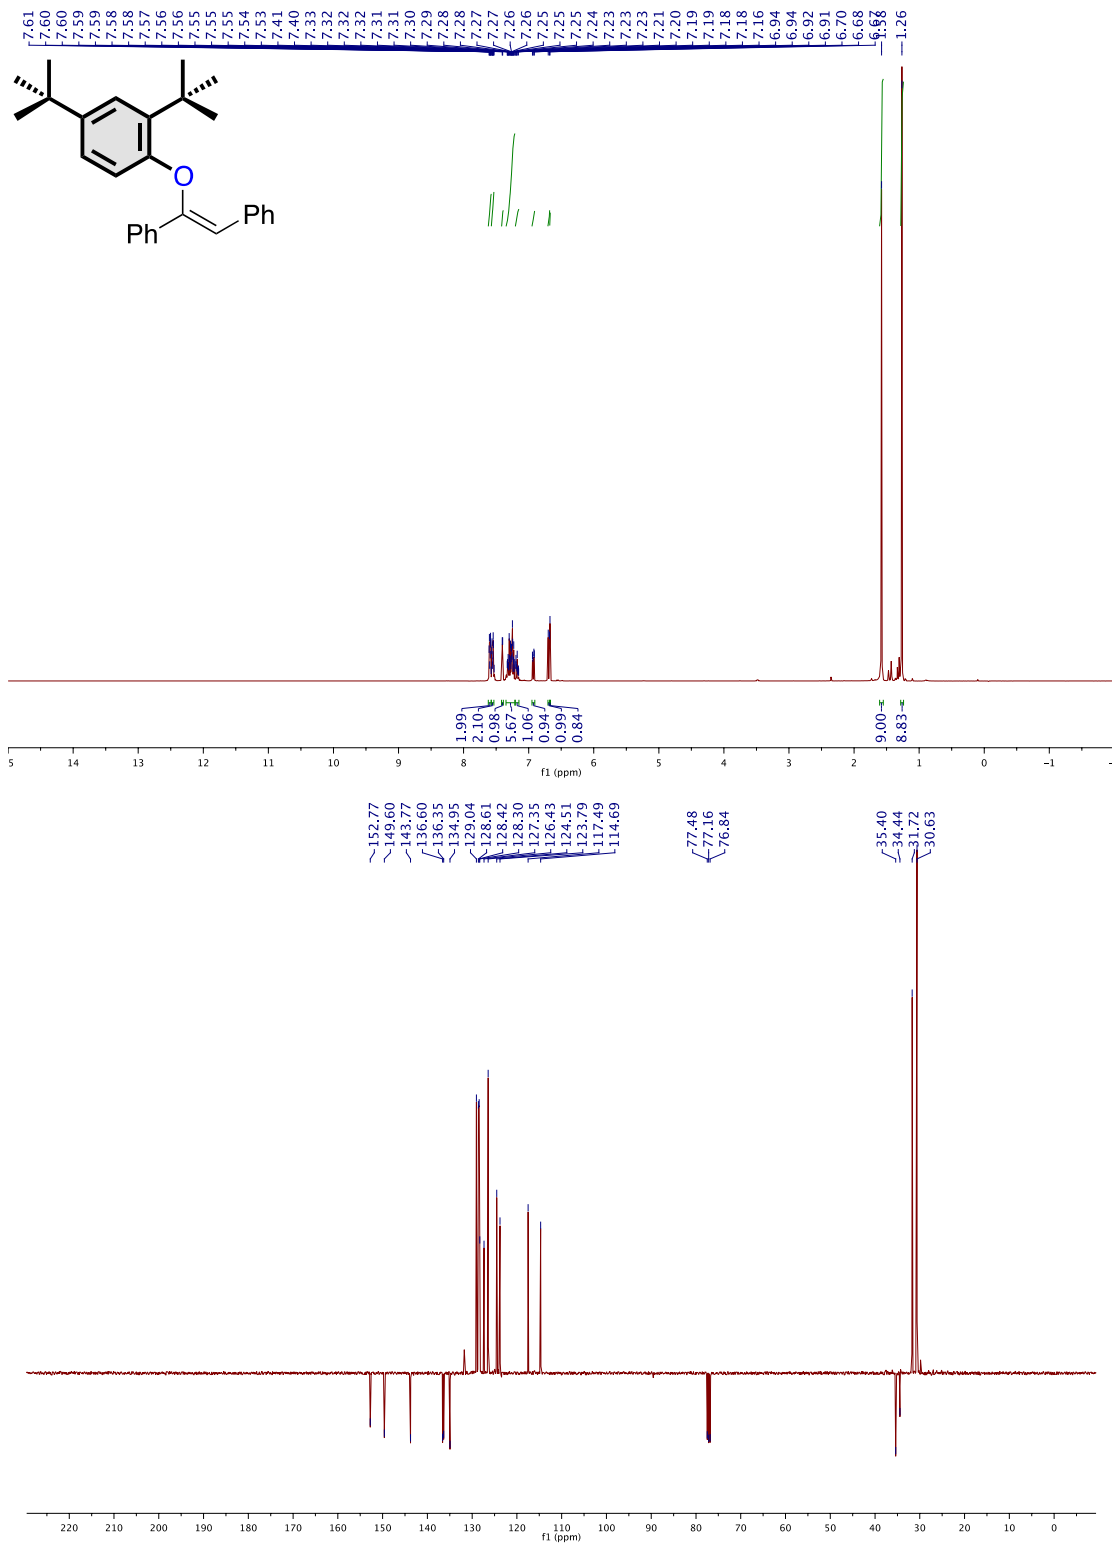

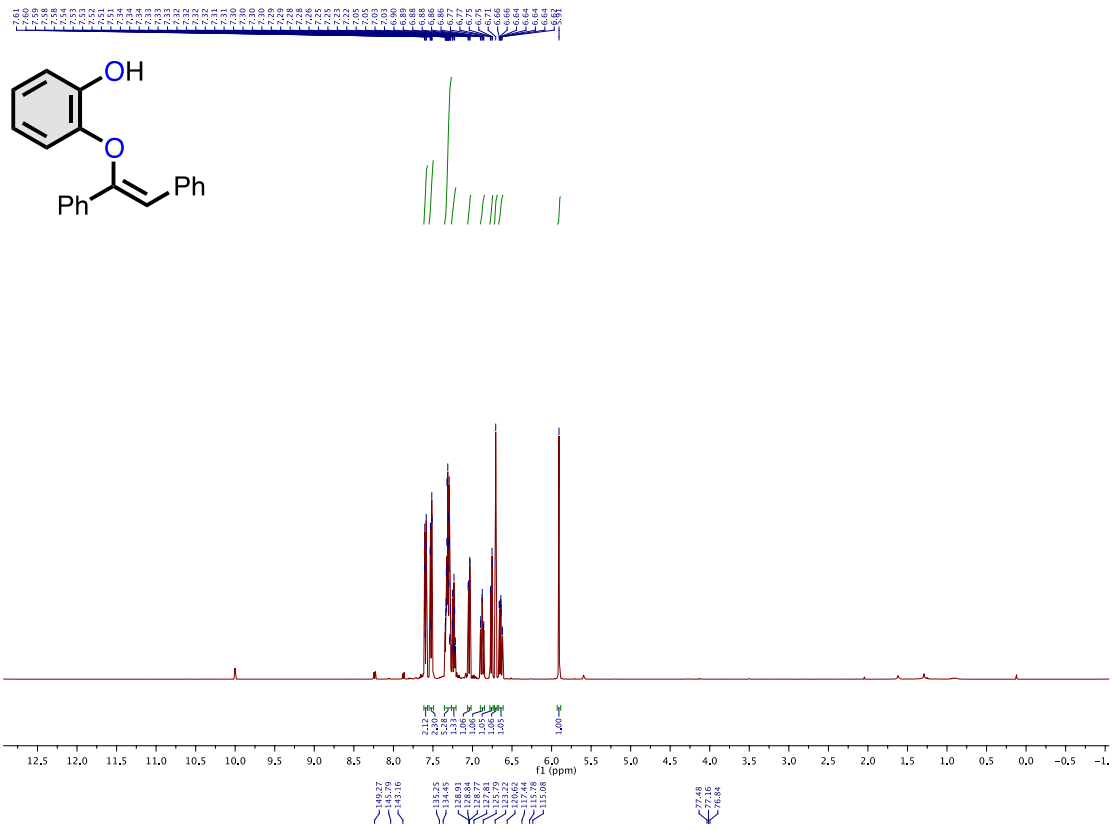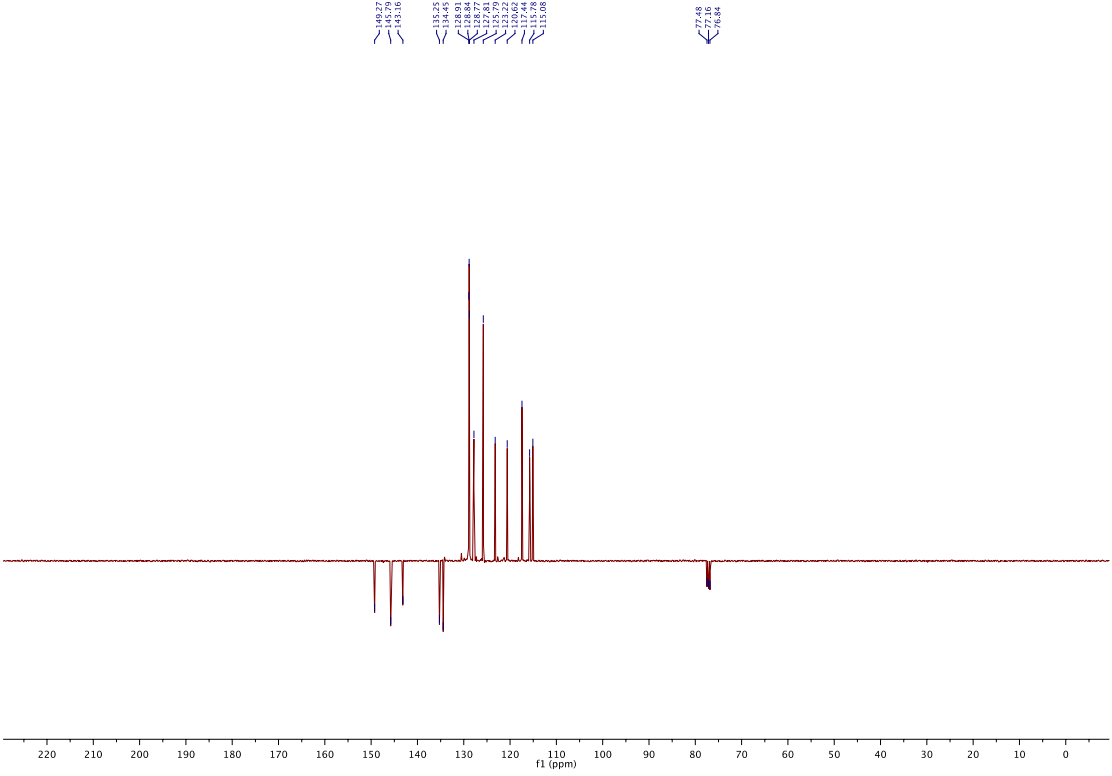



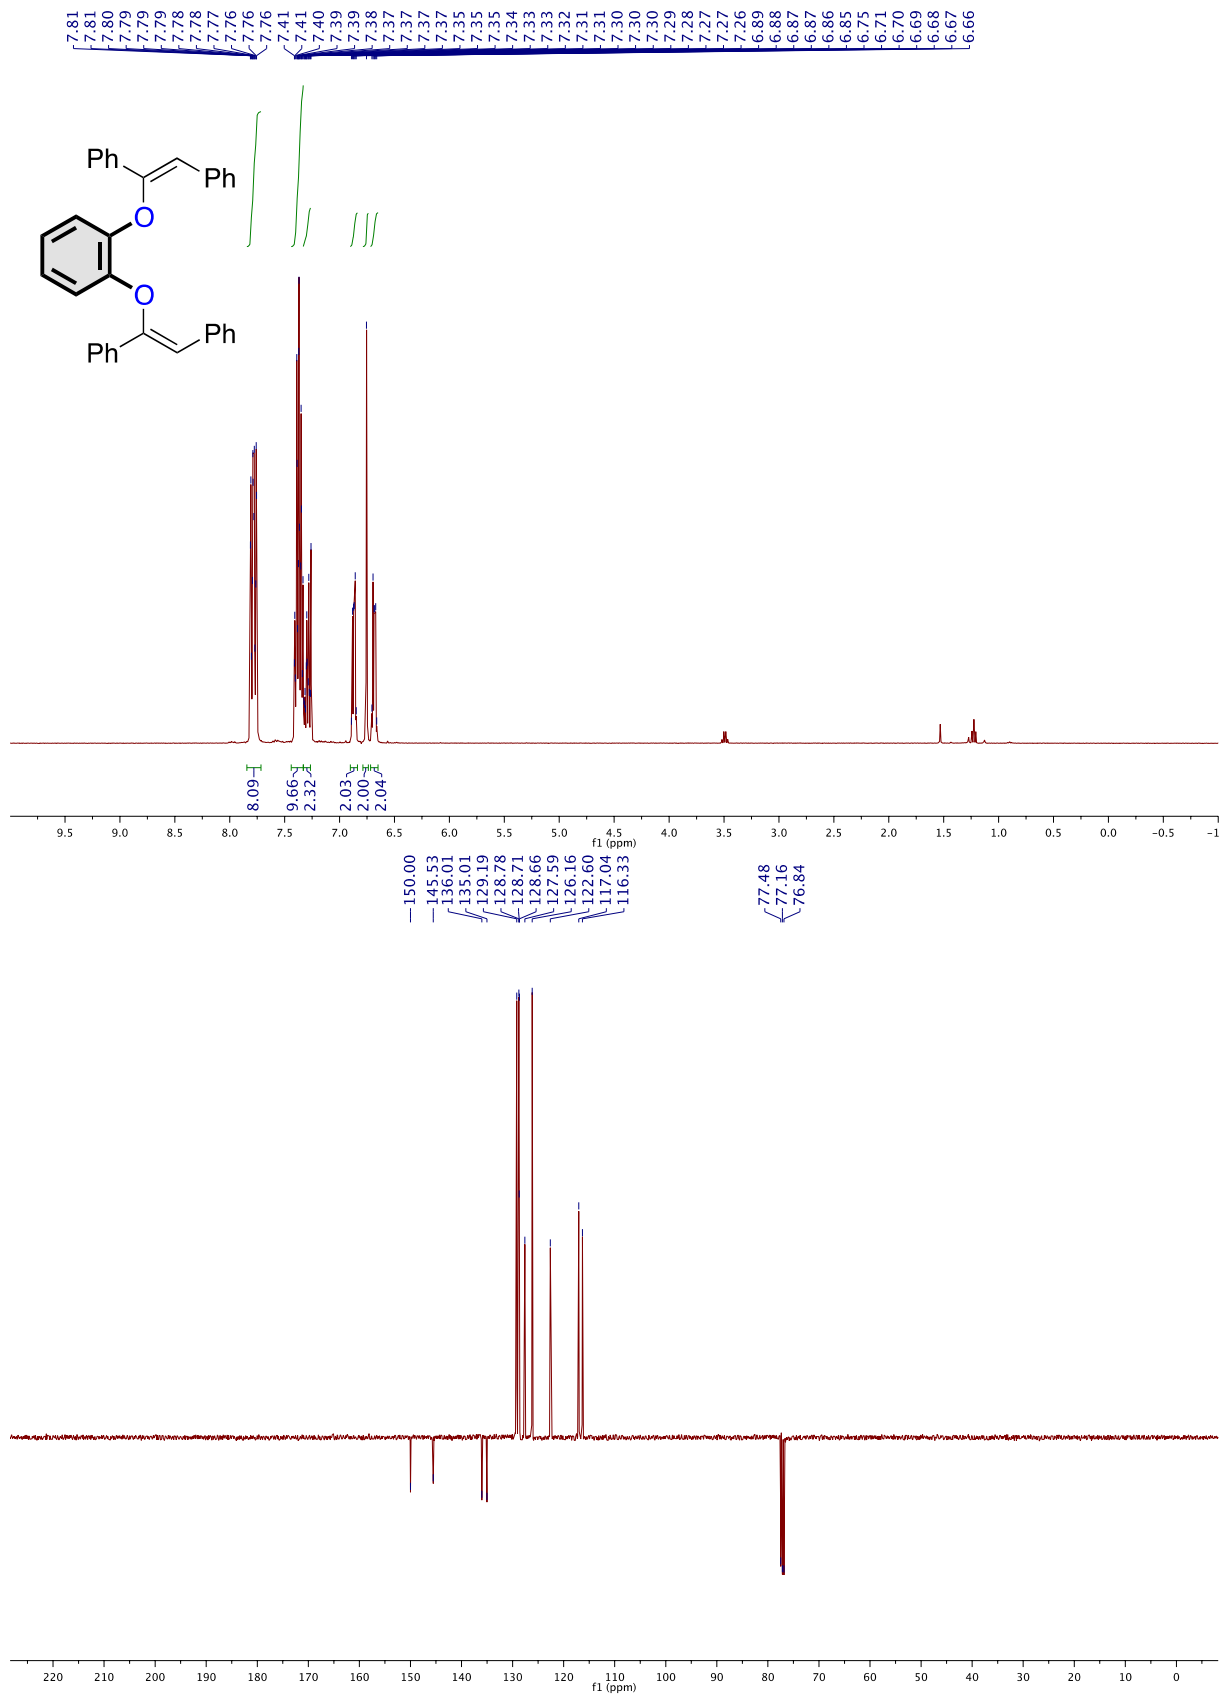

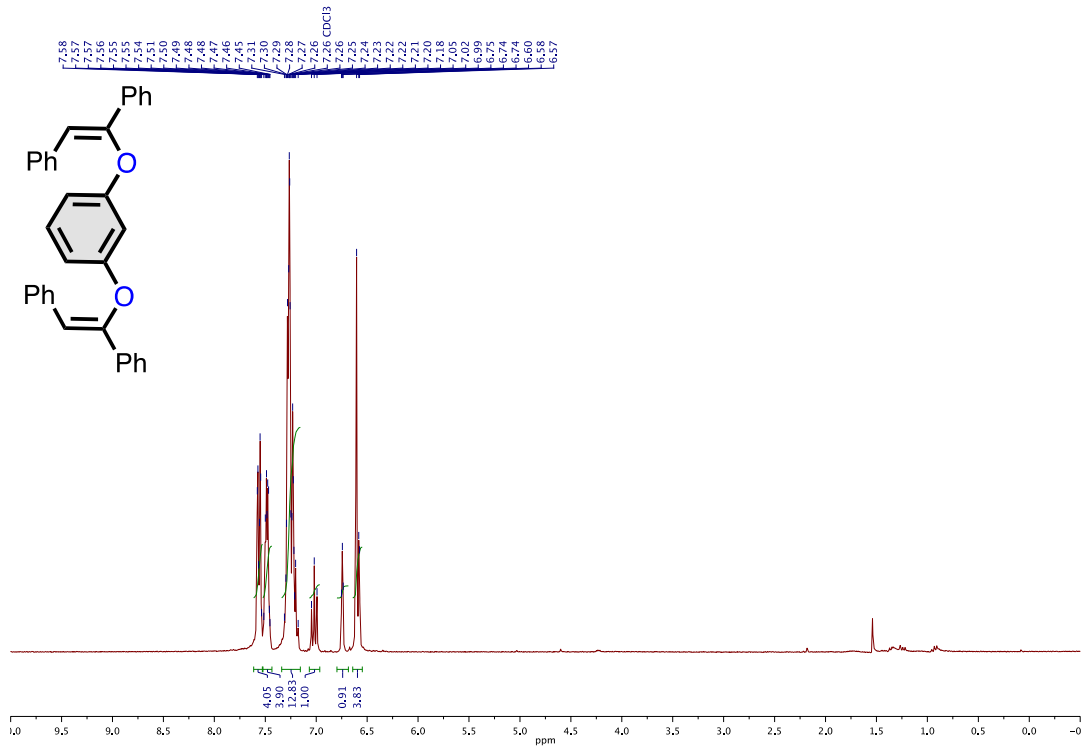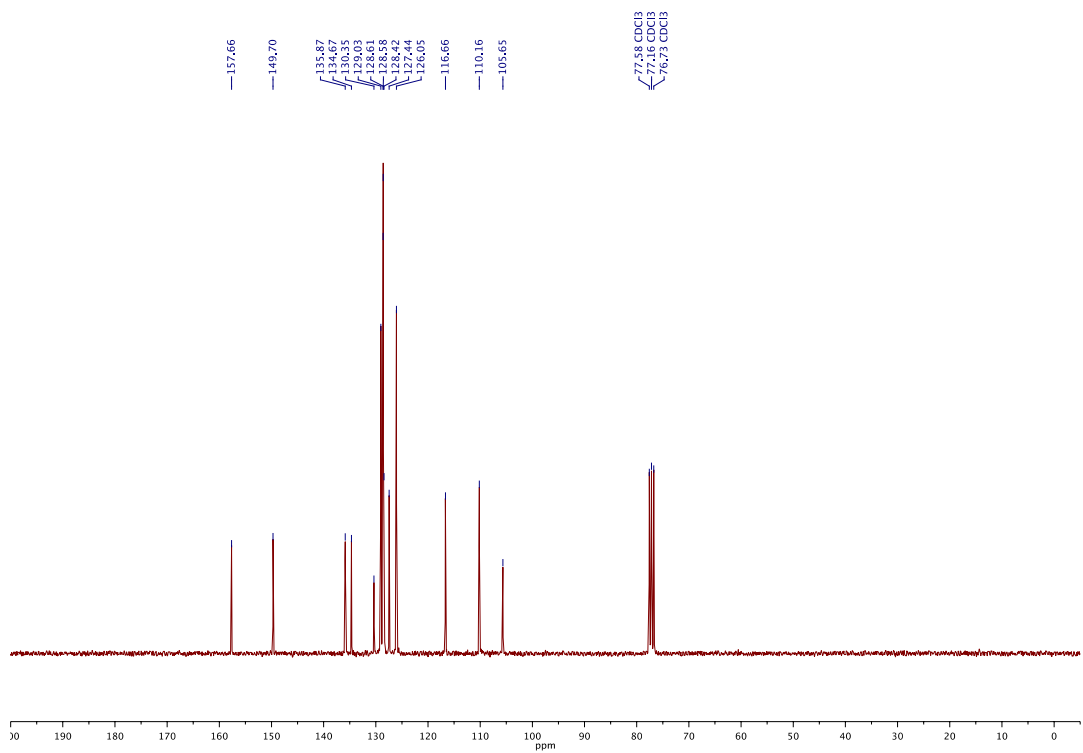

03072013-6-spn-am280-A

1H Observe

AM-2-120

CD2Cl2

7.806  
7.796  
7.781  
7.760  
7.566  
7.556  
7.555  
7.554  
7.531  
7.530  
7.500  
7.499  
7.479  
7.479  
7.229  
7.228  
7.228  
7.228  
7.227  
7.226  
6.61

5.32 CD2Cl2

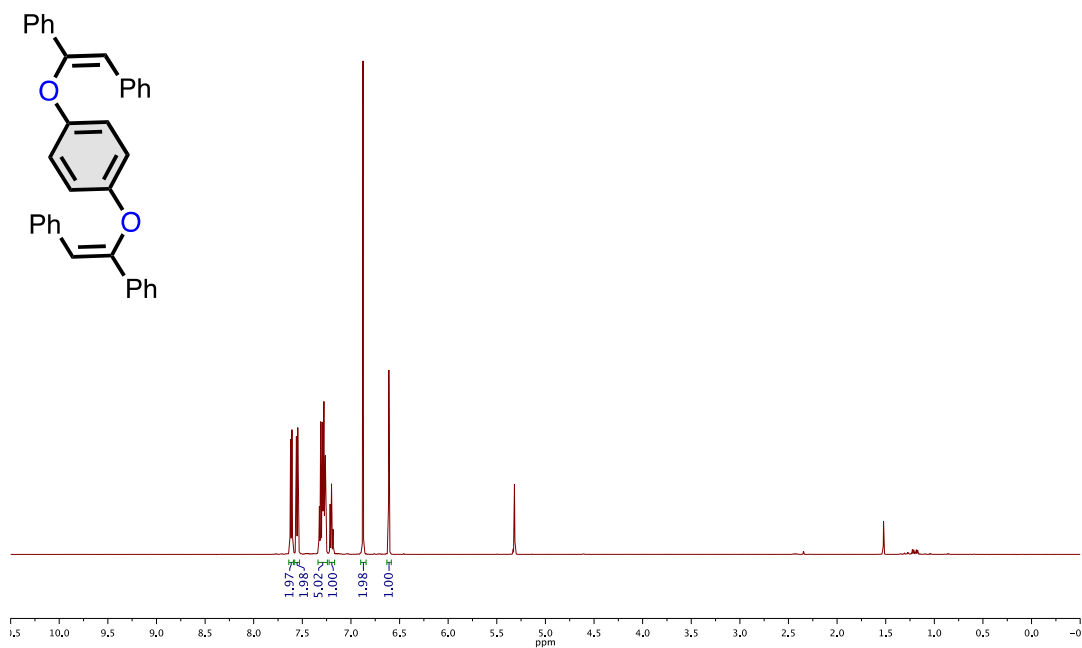

03092013-39-anthonyMR

AM-2-120

CD2Cl2

151.63  
150.37  
136.48  
135.30  
129.41  
129.07  
128.98  
117.64  
117.18

54.00 CD2Cl2

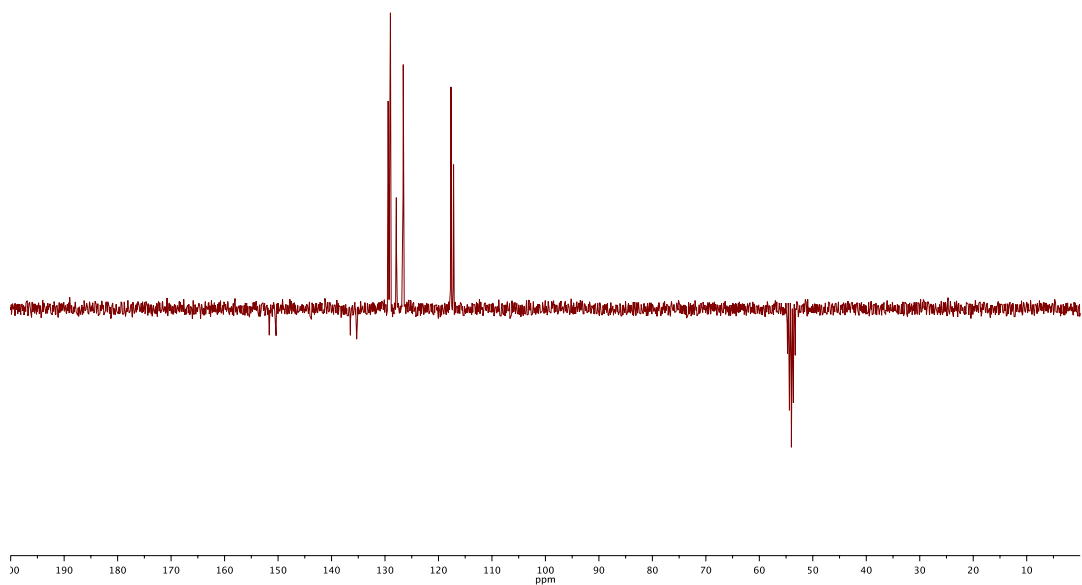

03132013-15-anthonyMM  
AM-2-127-A  
CD2Cl2

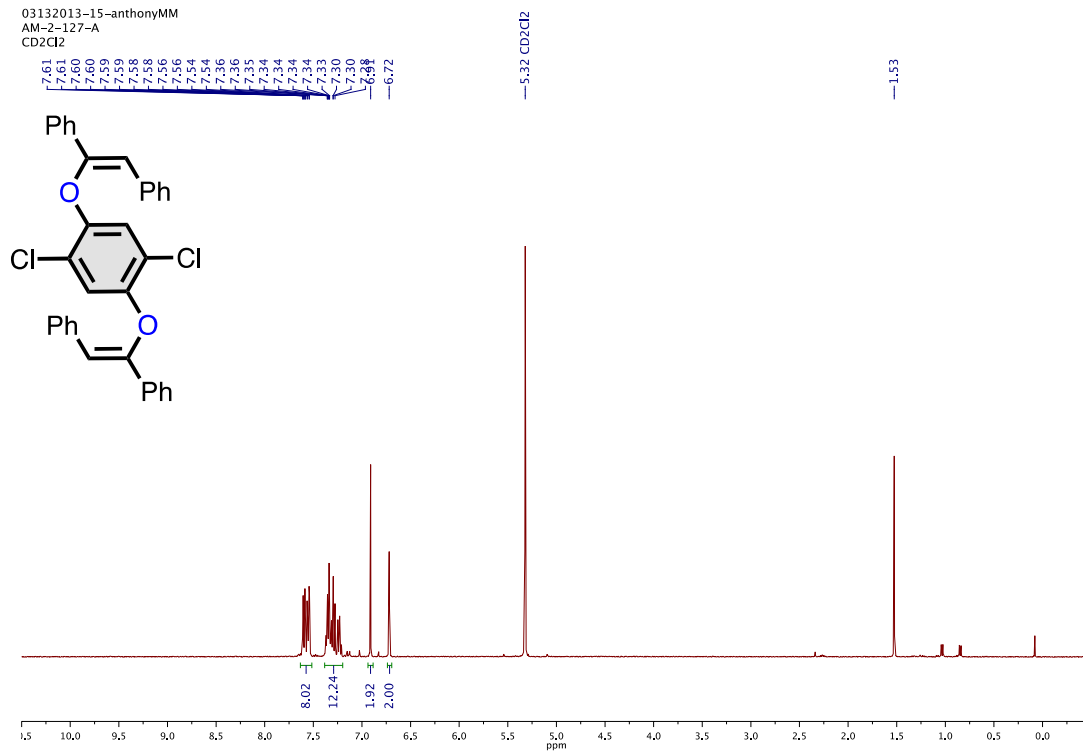

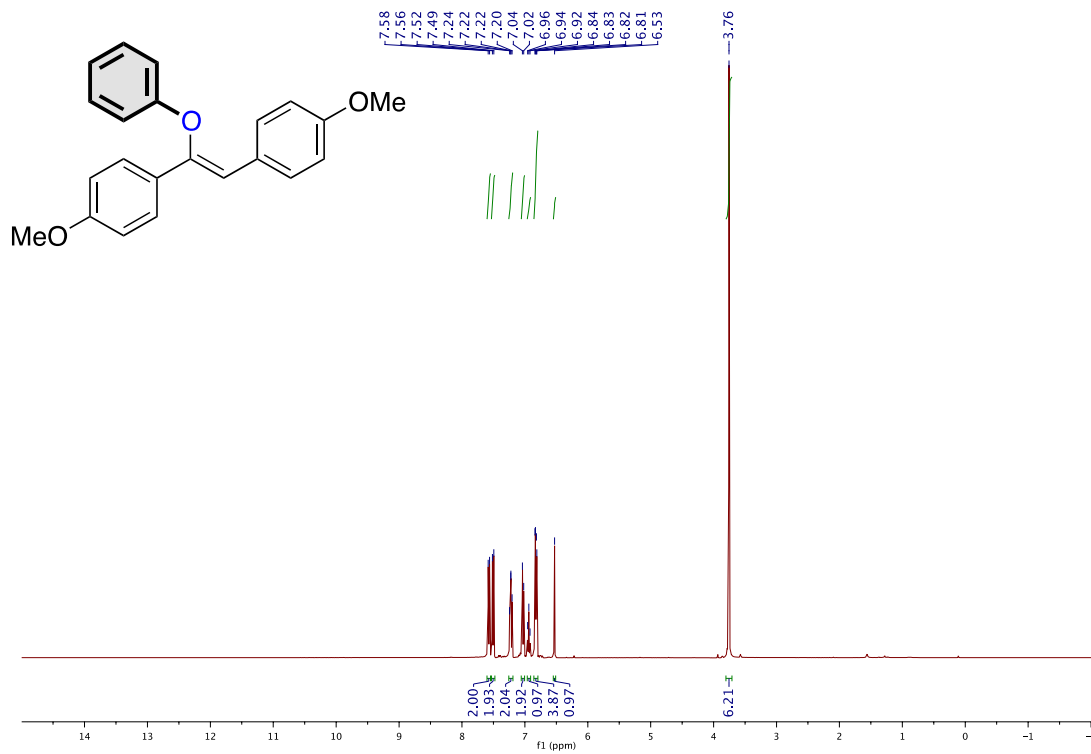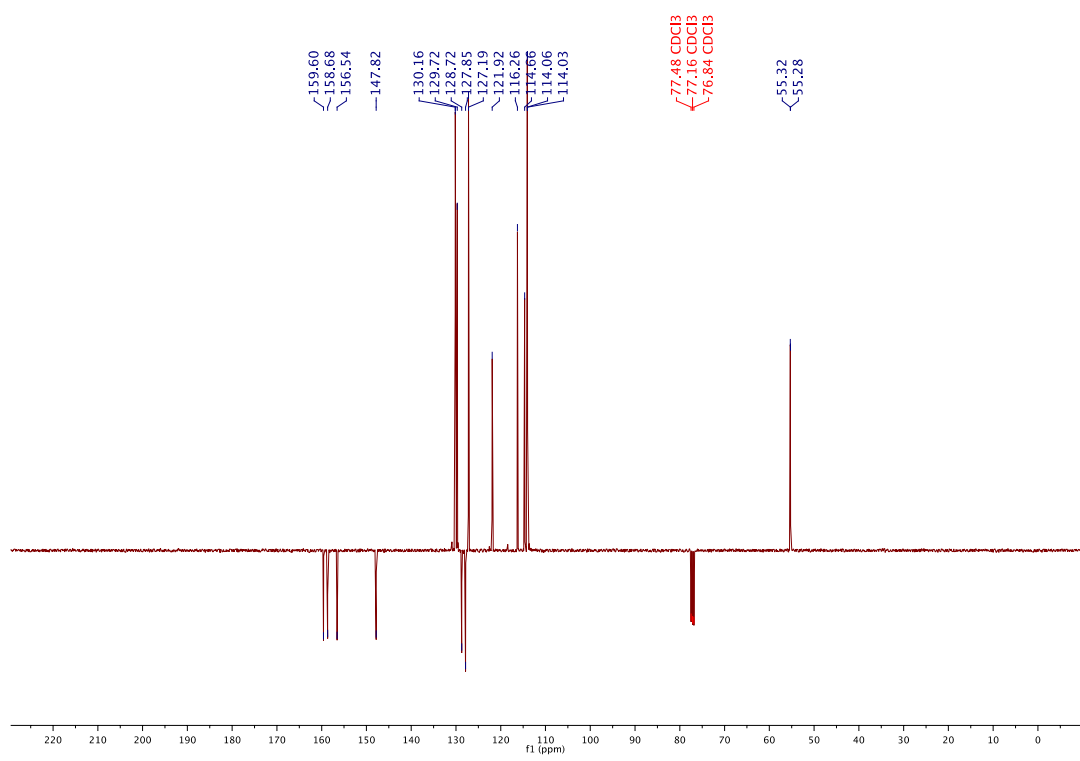

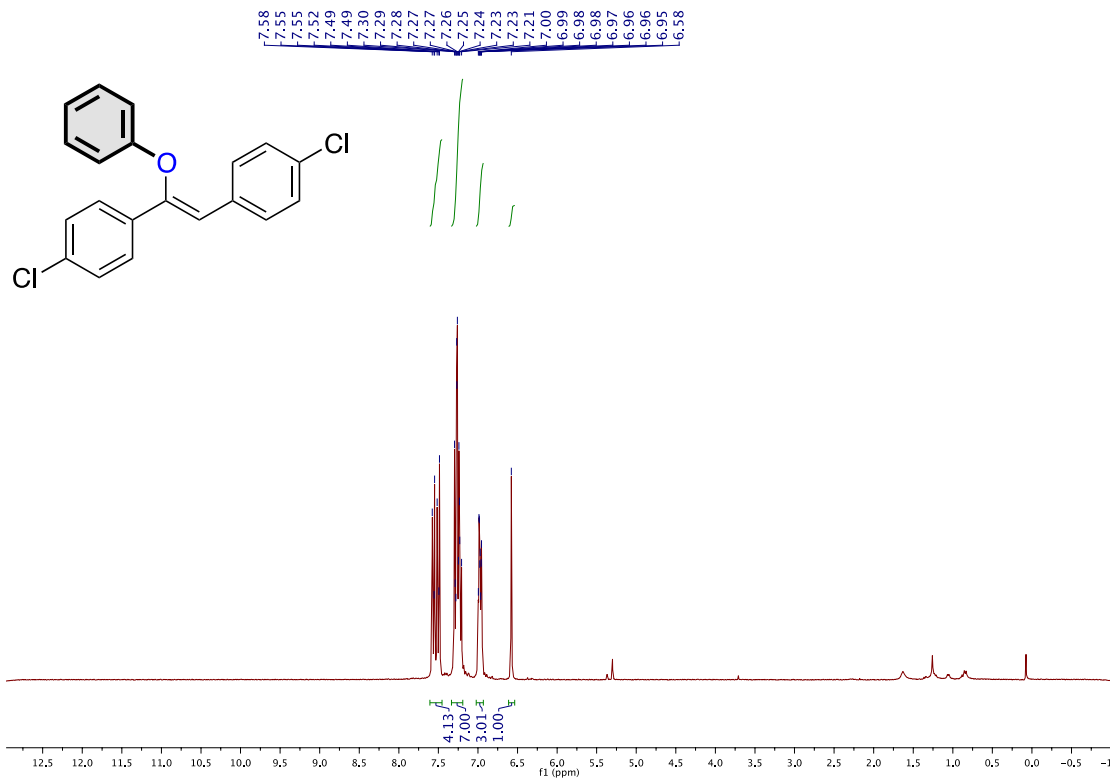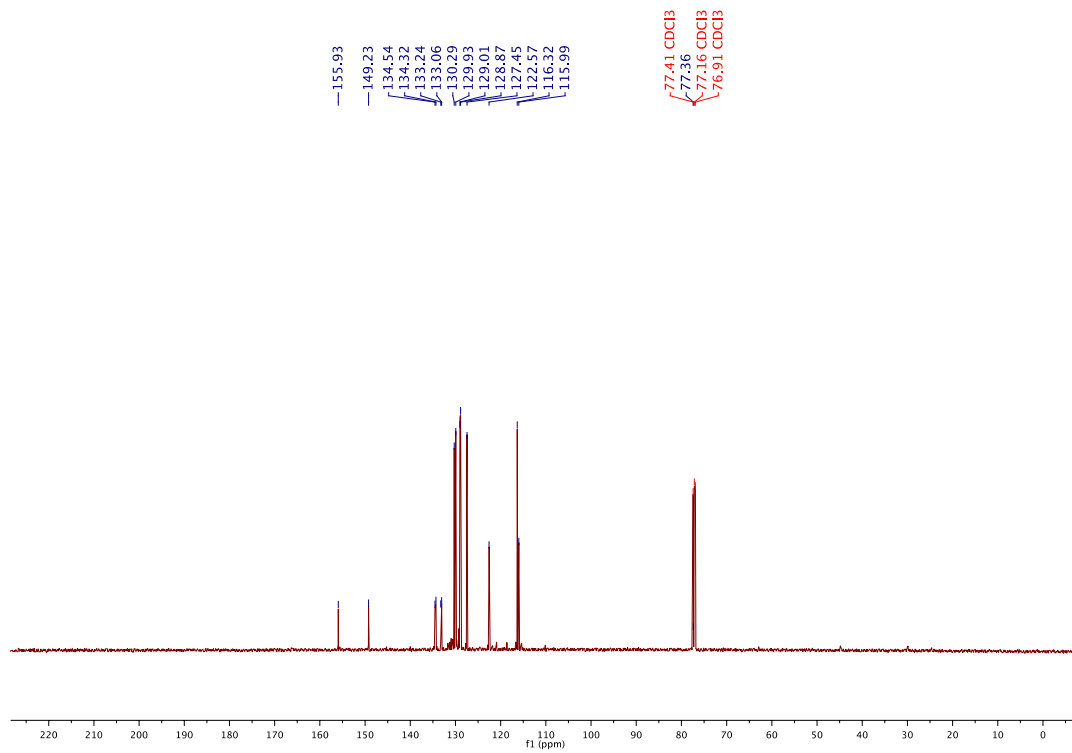

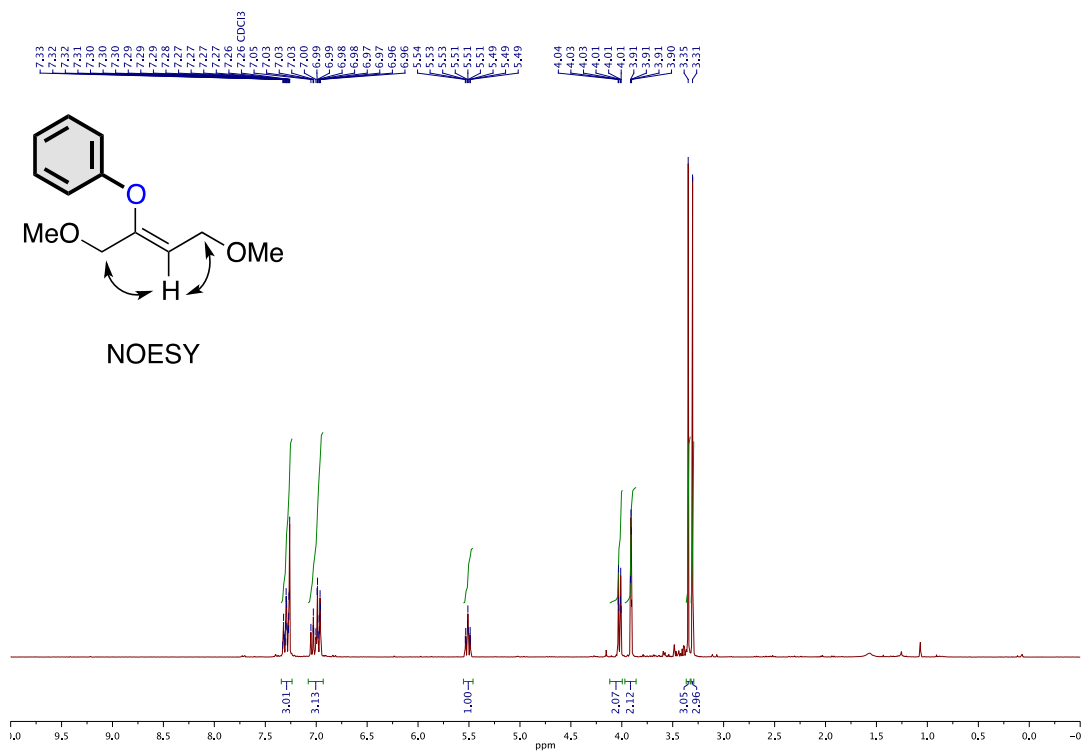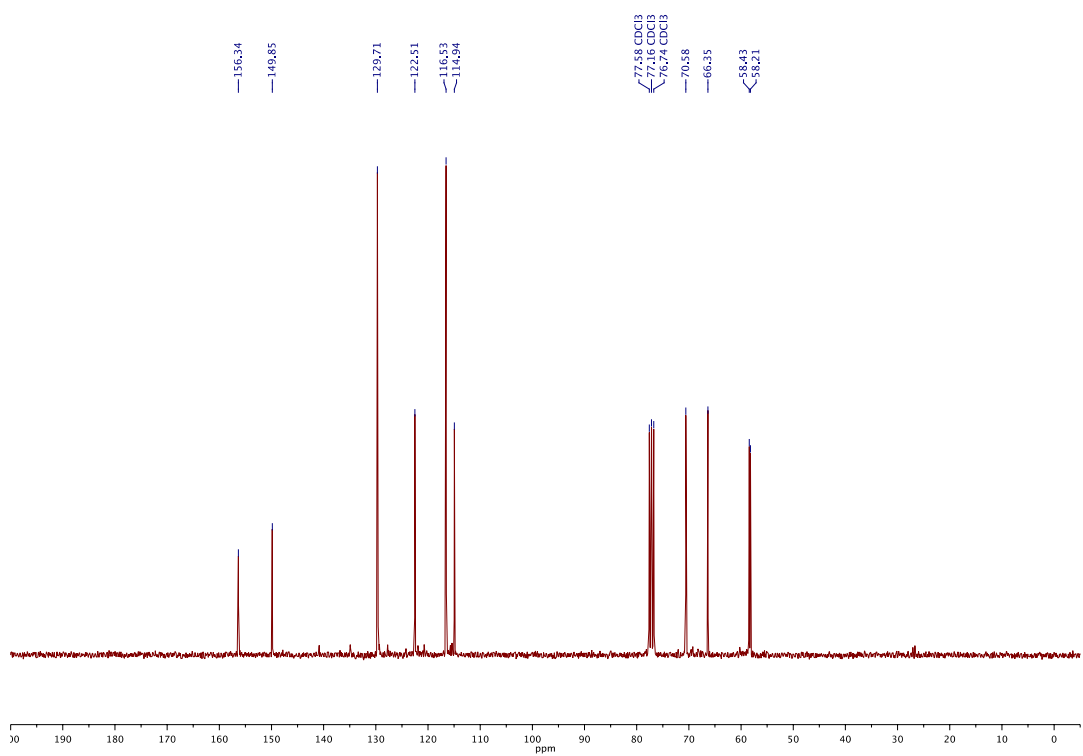

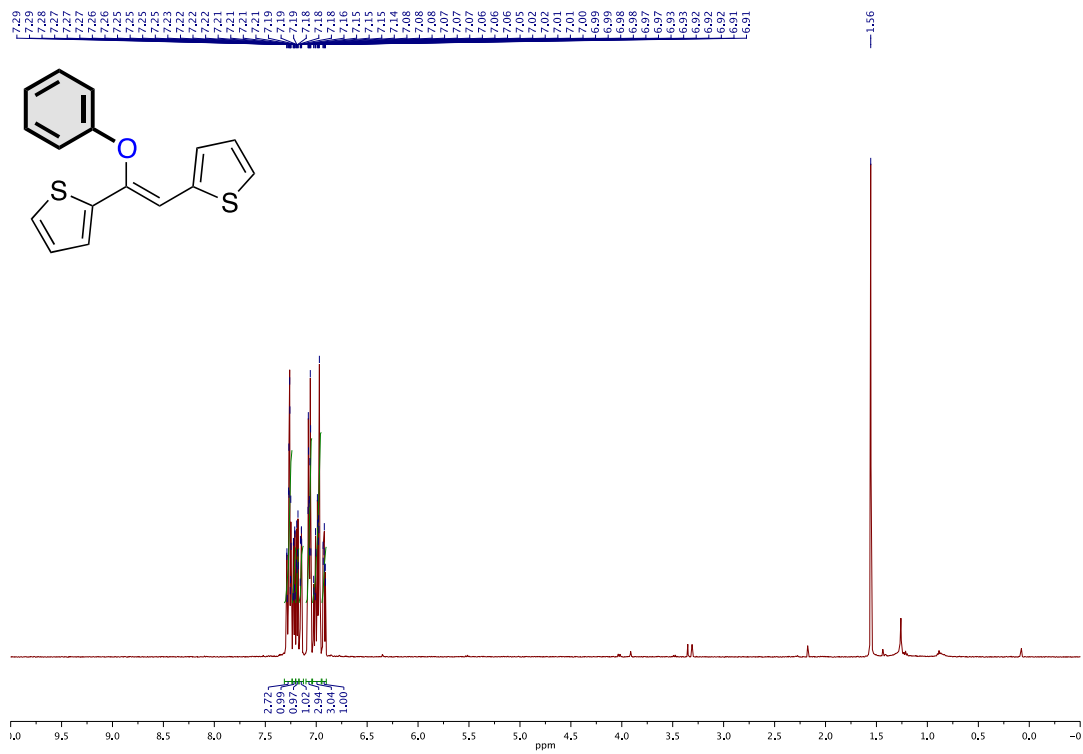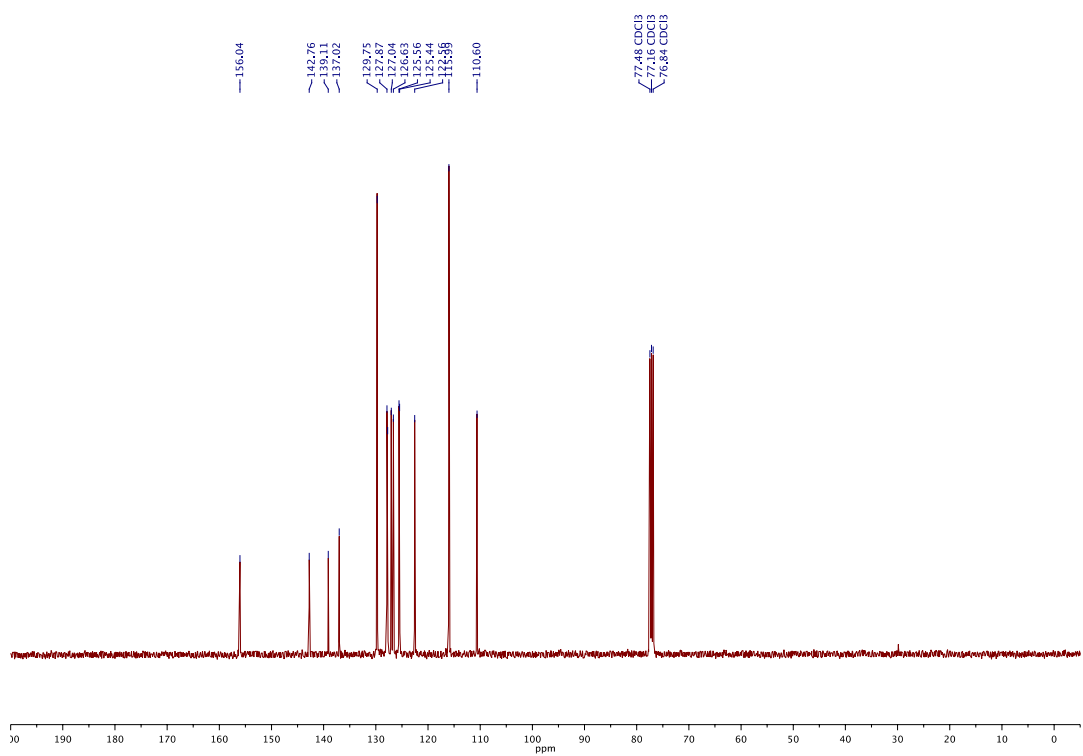



05312013-4-anthonyMR.10.fid  
AM-2-190  
CDCl3

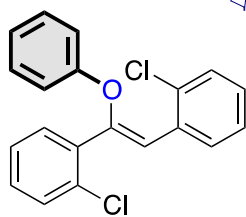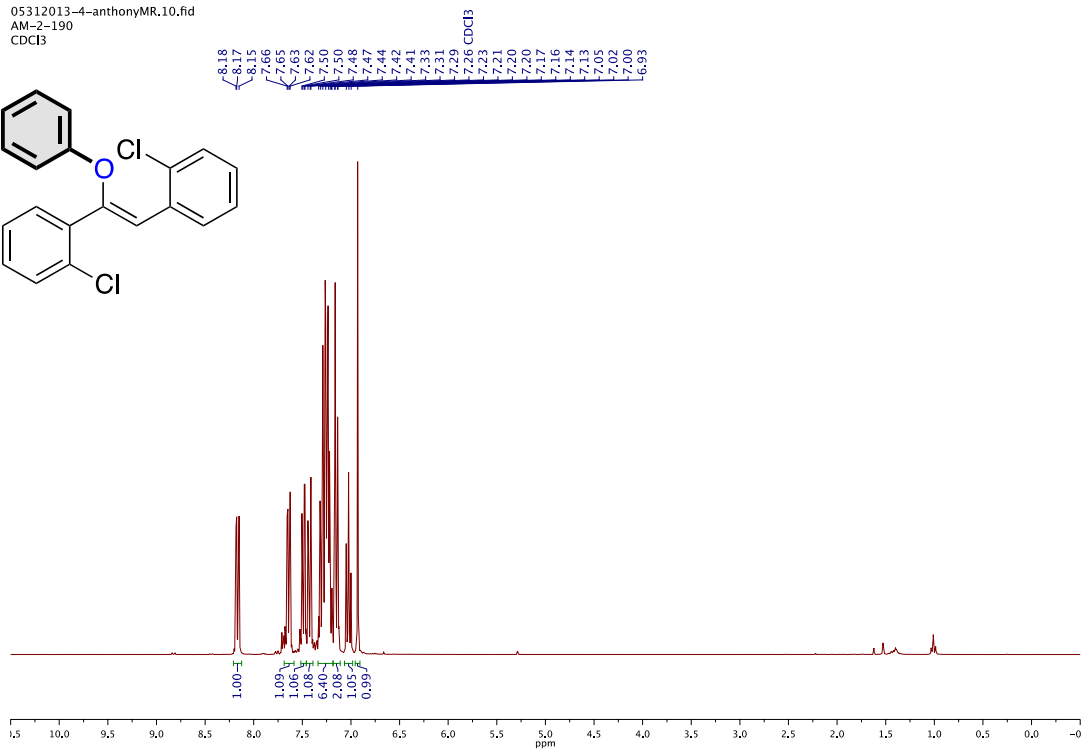

06012013-25-anthonyM.10.fid  
AM-2-190  
CDCl3

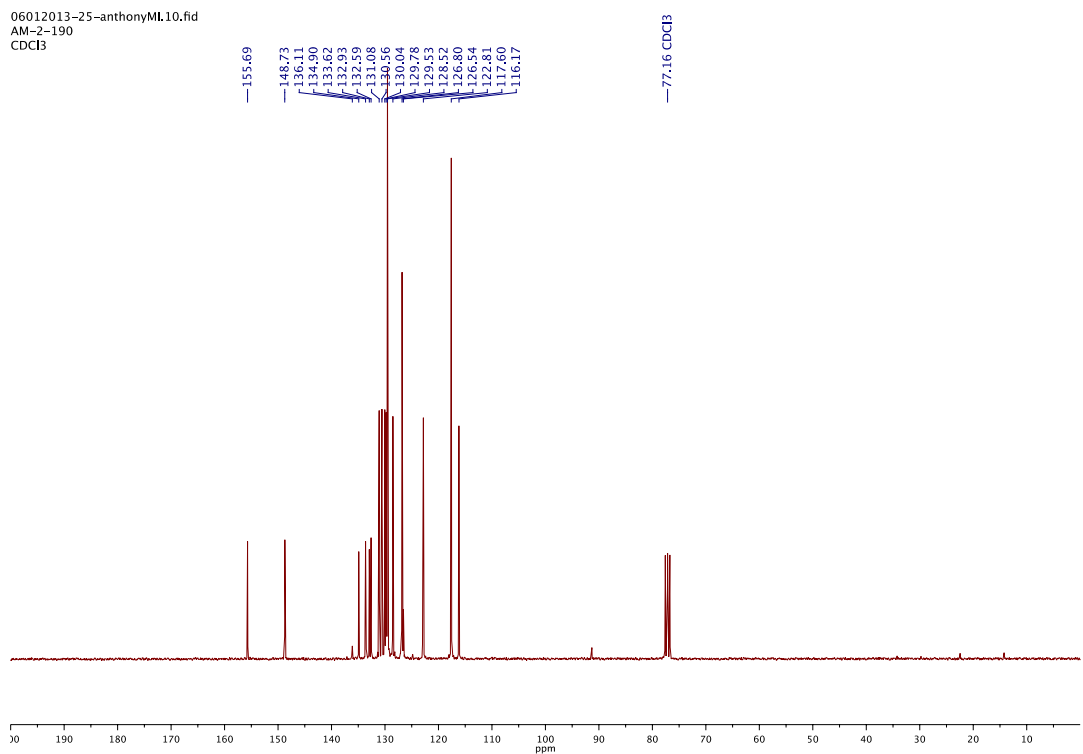



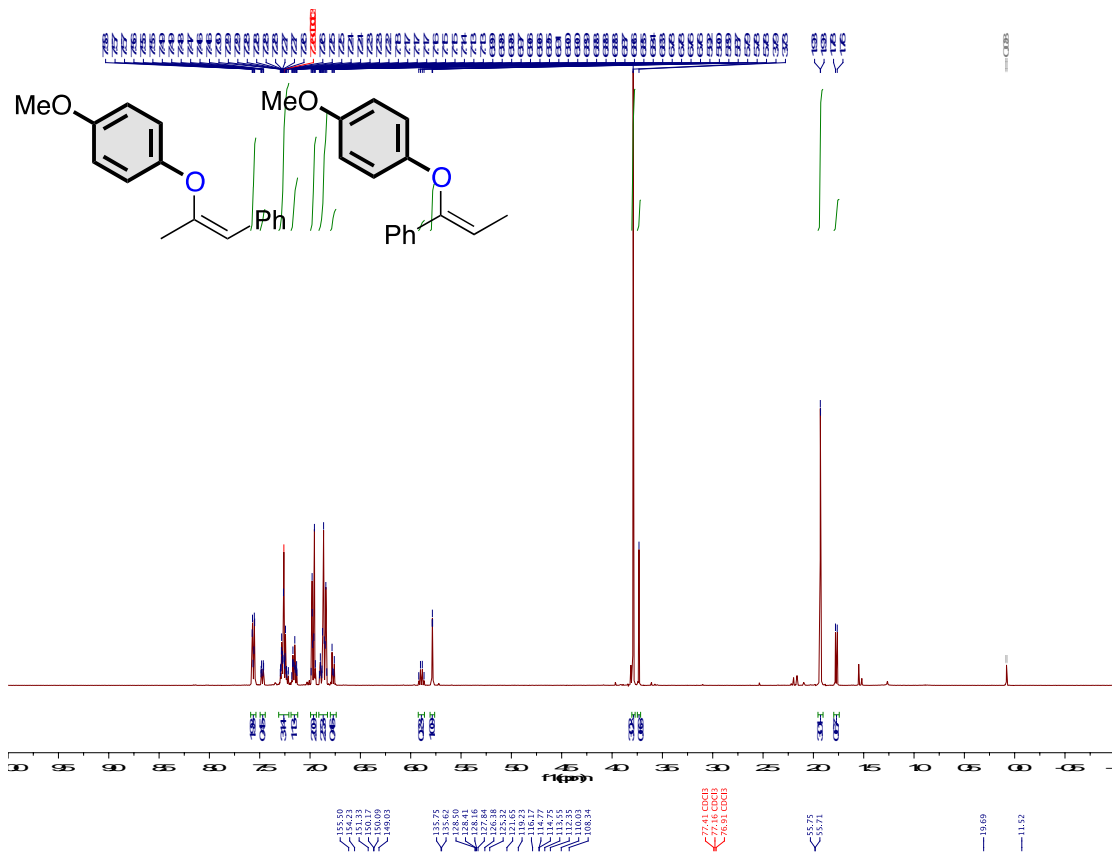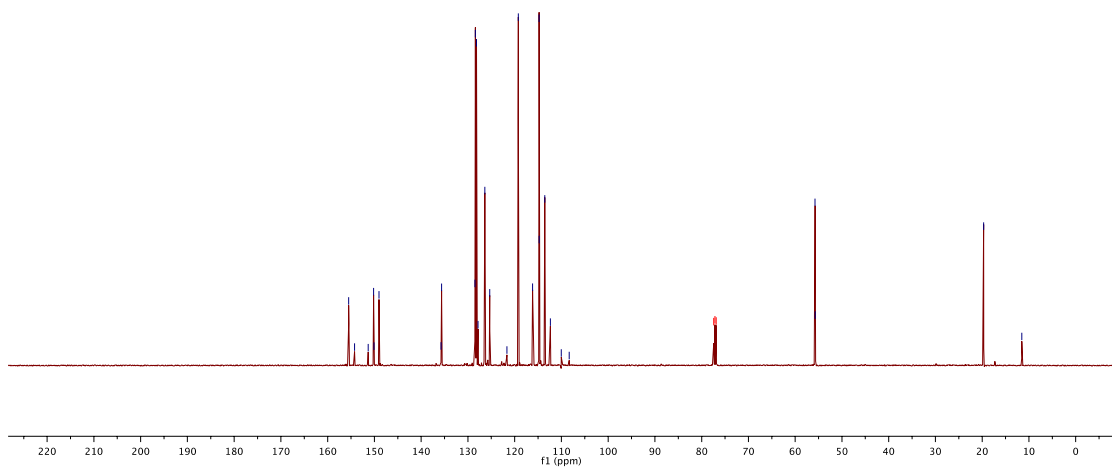

06072013-1-anthonyM.10.fid  
AM-2-202  
CDCl3

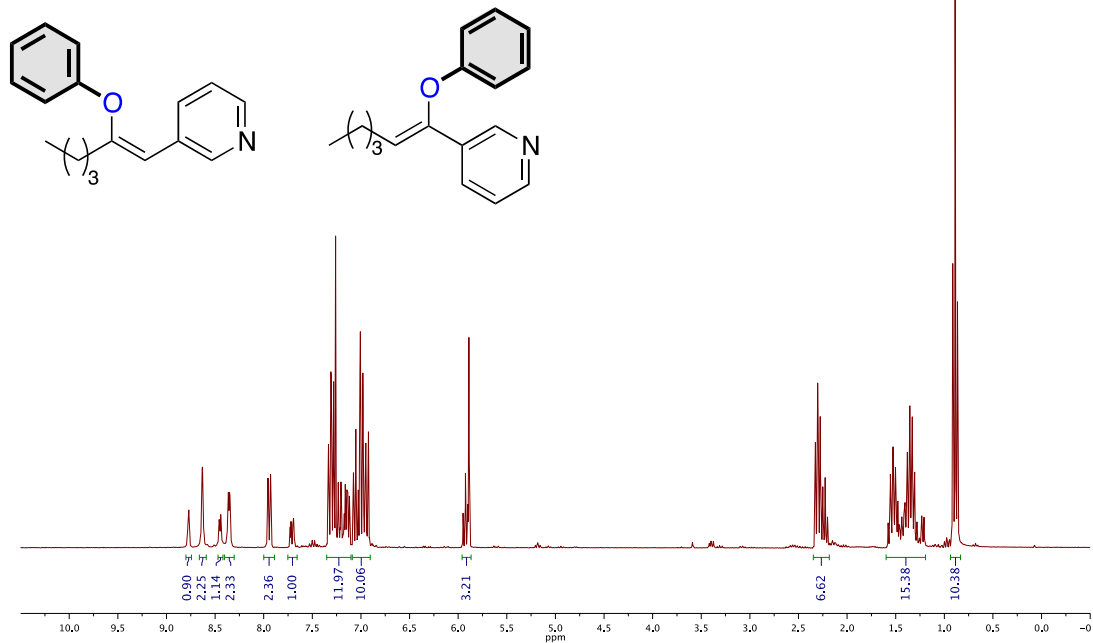

06082013-26-anthonyMM.13.fid  
AM-2-202  
CDCl3

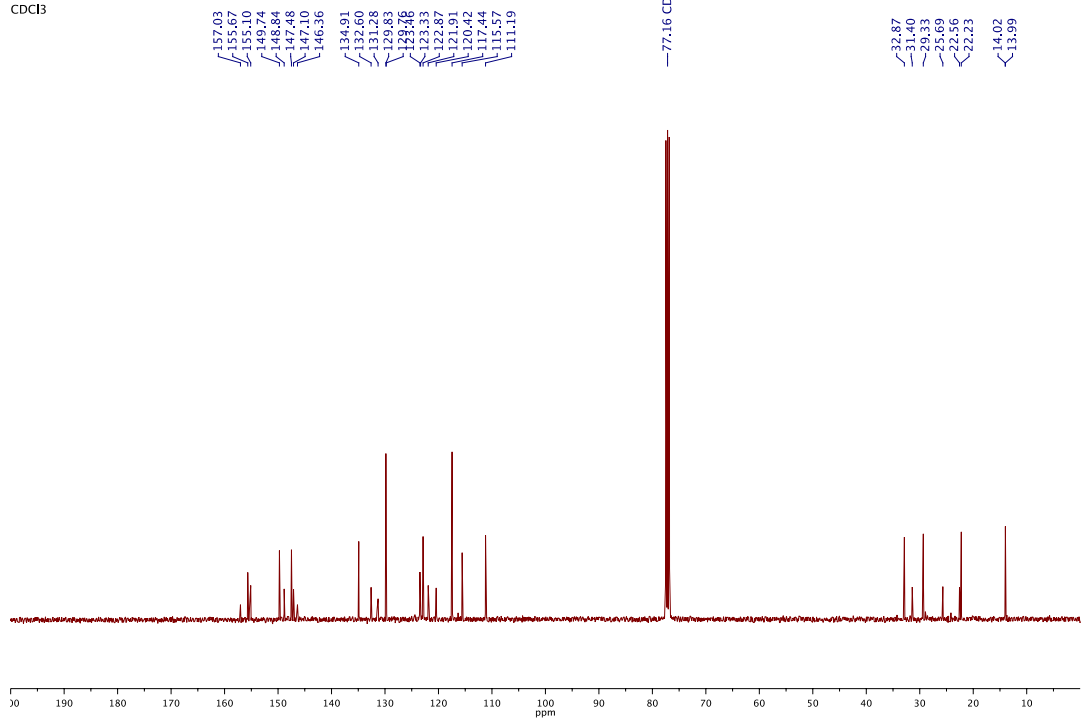

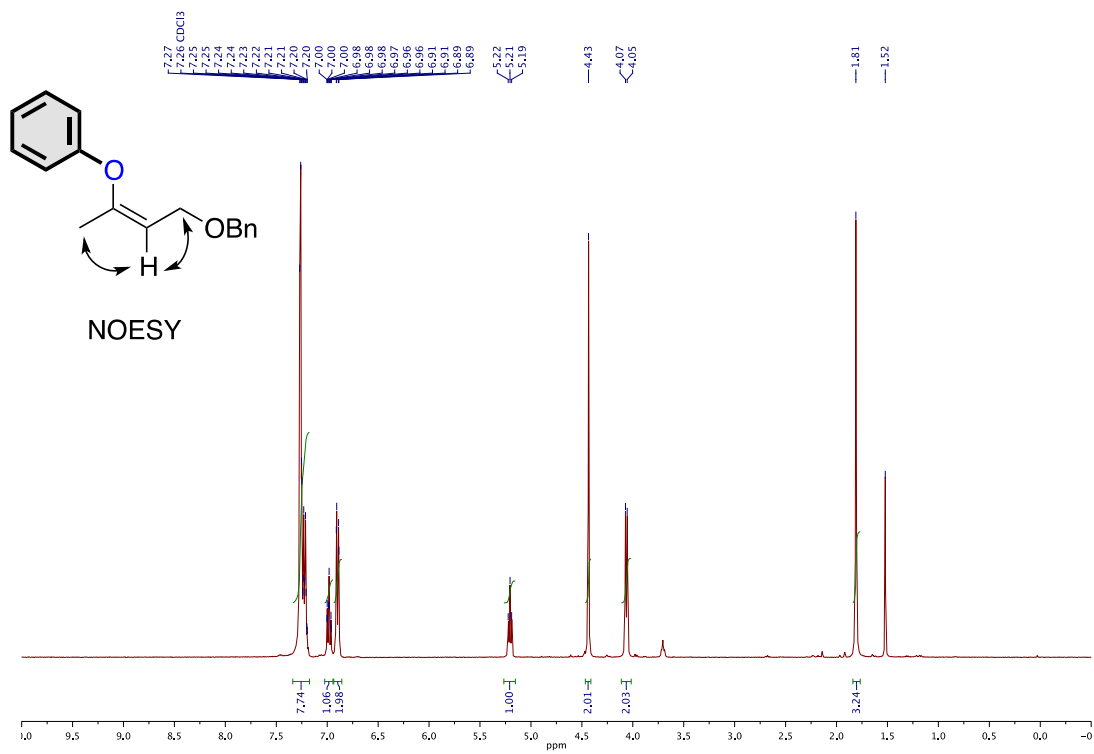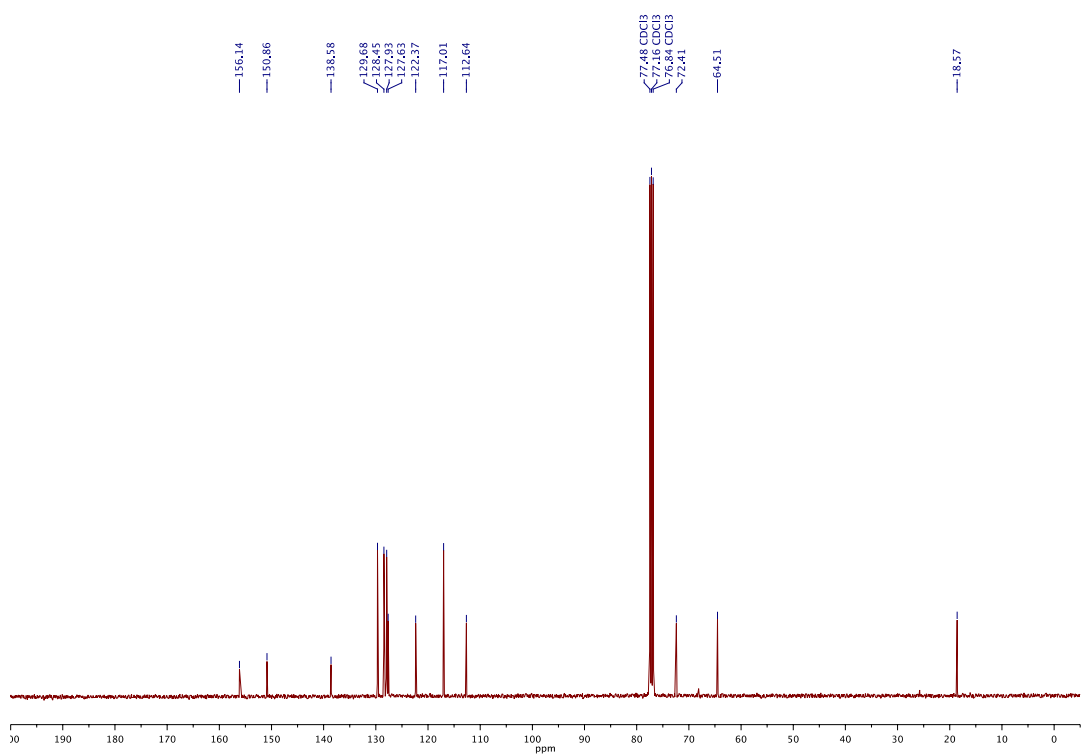

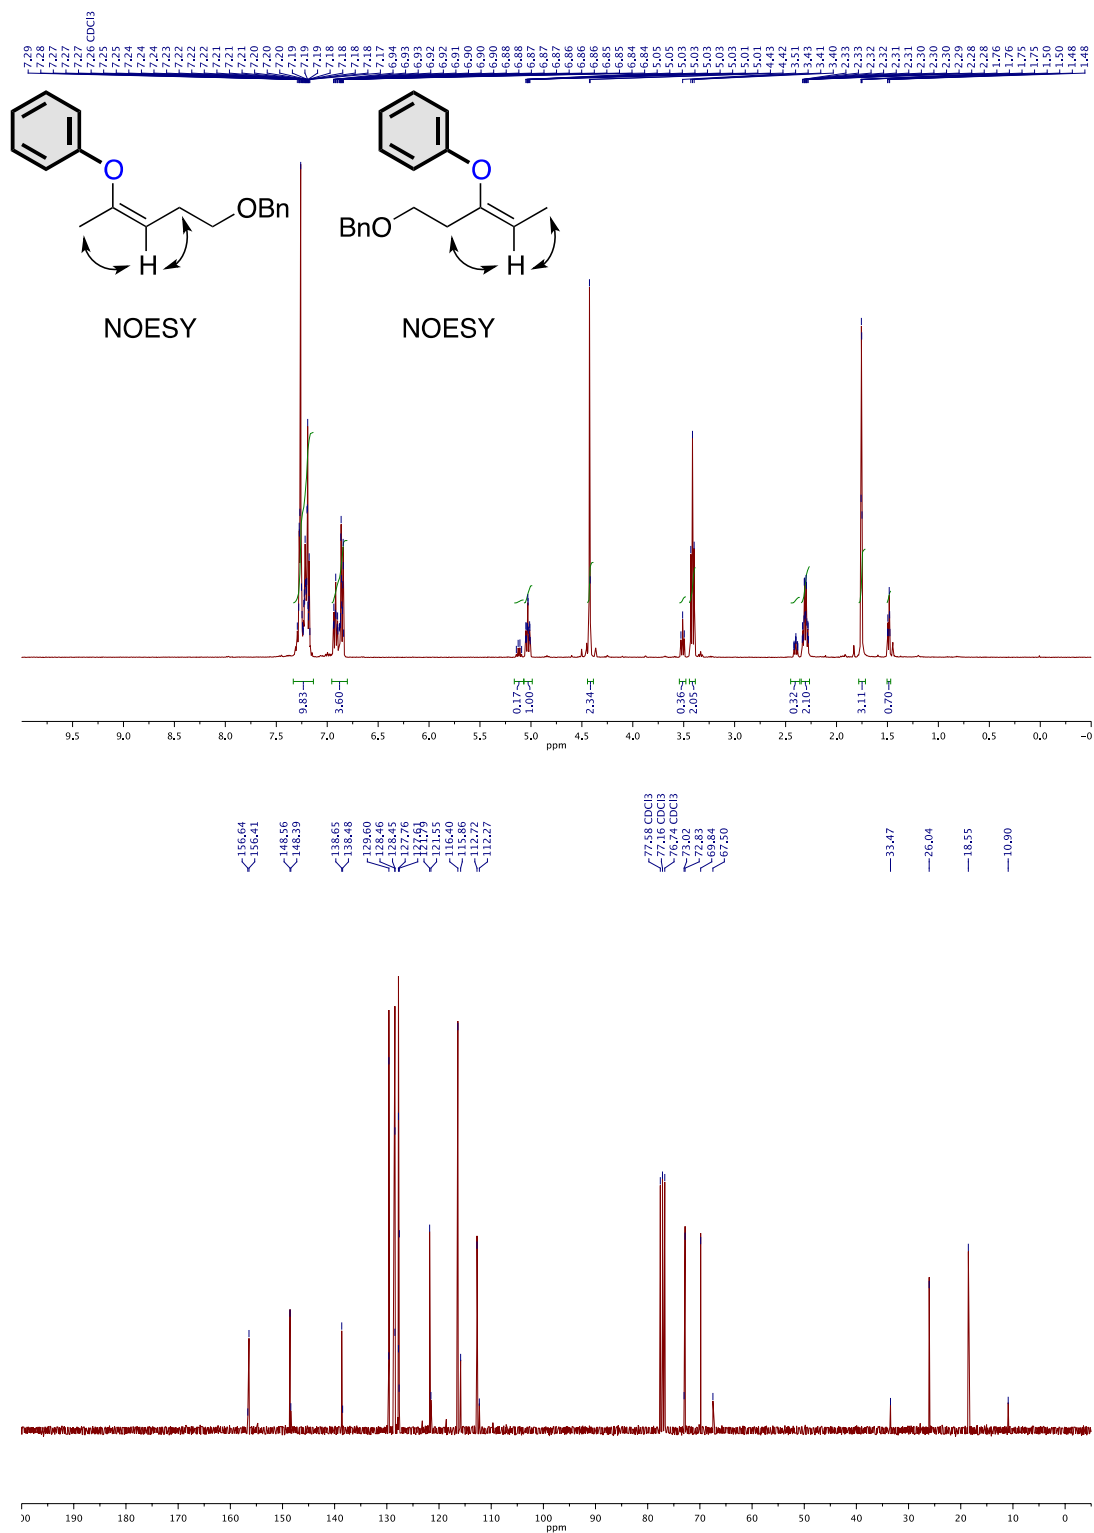

[1] a) R. S. Ramón, S. Gaillard, A. Poater, L. Cavallo, A. M. Z. Slawin, S. P. Nolan, *Chem. Eur. J.* **2011**, *17*, 1238-1246; b) A. Gómez-Suárez, Y. Oonishi, S. Meiries, S. P. Nolan, *Organometallics* **2013**, *32*, 1106-1111.

- [2] Y. Oonishi, A. Gomez-Suarez, A. R. Martin, S. P. Nolan, *Angew Chem Int Ed* **2013**, *52*, 9767-9771.
- [3] Y. Oonishi, A. Gomez-Suarez, A. R. Martin, Y. Makida, A. M. Slawin, S. P. Nolan, *Chem. Eur. J.* **2014**, *20*, 13507-13510.
- [4] M. R. Kuram, M. Bhanuchandra, A. K. Sahoo, *J. Org. Chem.* **2010**, *75*, 2247-2258.
- [5] H. Hiranuma, S. I. Miller, *J. Org. Chem.* **1982**, *47*, 5083-5088.
- [6] P. Chuentragool, K. Vongnam, P. Rashatasakhon, M. Sukwattanasinitt, S. Wacharasindhu, *Tetrahedron* **2011**, *67*, 8177-8182.
- [7] K. Semba, T. Fujihara, J. Terao, Y. Tsuji, *Chem. Eur. J.* **2012**, *18*, 4179-4184.
- [8] F. Alonso, I. Osante, M. Yus, *Tetrahedron* **2007**, *63*, 93-102.
